# Supplementary material
Source: publisher figshare collection journal article supplement (https://acs.figshare.com/ndownloader/files/26205571)
Supplement: Supplementary file 1 [file 26205571]

## **Supporting Information**

### **Serendipitous Formation of Various Selenium Heterocycles Hidden in the Classical Synthesis of Selenophene**

Patrycja Męcik, Bartłomiej Pigulski,\* Sławomir Szafert\*

*Faculty of Chemistry, University of Wrocław, F. Joliot-Curie 14, 50-383 Wrocław, Poland*

B.P.: bartlomiej.pigulski@chem.uni.wroc.pl

S.S.: slawomir.szafert@chem.uni.wroc.pl

## Contents

|                                              |           |
|----------------------------------------------|-----------|
| <b>1. General.....</b>                       | <b>3</b>  |
| <b>2. Synthesis.....</b>                     | <b>4</b>  |
| <b>3. X-Ray Crystallography Details.....</b> | <b>14</b> |
| <b>4. NMR spectra.....</b>                   | <b>17</b> |
| <b>5. References .....</b>                   | <b>32</b> |

## 1. General

All reactions were conducted under N<sub>2</sub> by using standard Schlenk techniques. Glassware was pre-dried at 120 °C. Solvents were treated as follows: CH<sub>3</sub>CN was distilled from P<sub>2</sub>O<sub>5</sub>, Et<sub>2</sub>O (pure for analysis), CH<sub>2</sub>Cl<sub>2</sub> (pure for analysis), hexane (pure for analysis) were used as received. 1-Bromobutadiynes were obtained according to the known procedures.<sup>1</sup> Piperidine (puriss p.a.), *N*-methylbenzylamine (97%), 2-methylaminomethyl-1,3-dioxolane (98%), morpholine (99%), diethylamine (99%), NaBH<sub>4</sub> (96%), diphenyl diselenide (98%), Se (puriss p.a) and Te (99.5%) were used as received.

<sup>1</sup>H and <sup>13</sup>C NMR spectra were recorded with a 500 MHz spectrometer with an inverse broadband probe. <sup>77</sup>Se NMR spectra were recorded with a 600 MHz spectrometer with an inverse broadband probe. A solution of diphenyl diselenide in CDCl<sub>3</sub> at 25 °C in a sealed capillary was used as an external standard ( $\delta$  = 463 ppm).<sup>2</sup> For all the <sup>1</sup>H NMR spectra, the chemical shifts are given in ppm relative to the solvent residual peaks (CDCl<sub>3</sub>, <sup>1</sup>H: 7.26 ppm, <sup>13</sup>C: 77.16 ppm). Coupling constants are given in Hz. HRMS spectra were recorded using a spectrometer with an ESI ion source and TOF or ICR ion analyser. For HRMS analysis the monoisotopic *m/z* values and isotope patterns were calculated using enviPat 2.4.<sup>3</sup> <sup>80</sup>Se was used for calculation of monoisotopic peaks.

### *Details of X-ray data collection and reduction*

X-ray diffraction data were collected with the use of  $\omega$  scan technique. The space groups were determined from systematic absences and subsequent least-squares refinement. Lorentz and polarization corrections were applied. The structures were solved by direct methods and refined by full-matrix, least-squares on *F*<sup>2</sup> by use of the SHELXTL Package.<sup>4</sup> Non-hydrogen atoms were refined with anisotropic thermal parameters. Hydrogen atom positions were calculated and added to the structure factor calculations, but were not refined.

## 2. Synthesis

### Scheme S1. Test reactions.

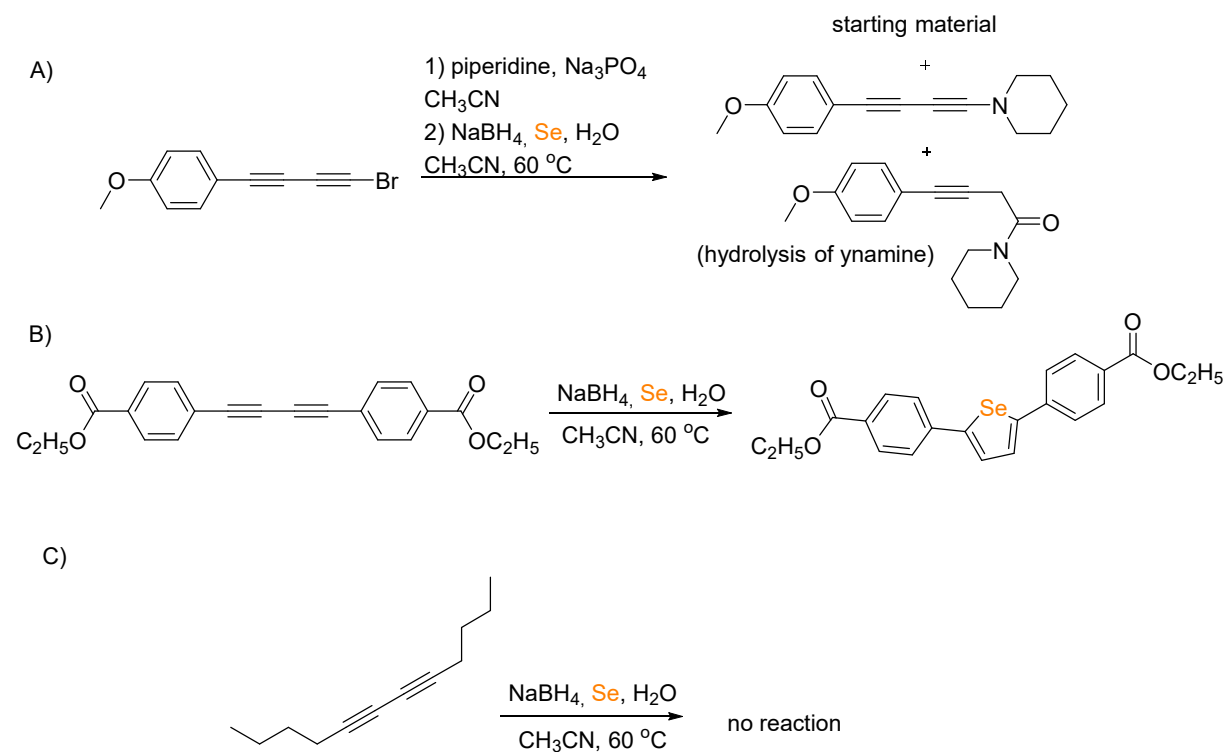

**(3aa) 4,4'-(Diselanediyldis(5-(diethylamino)selenophene-3,2-diyl))dibenzonitrile**

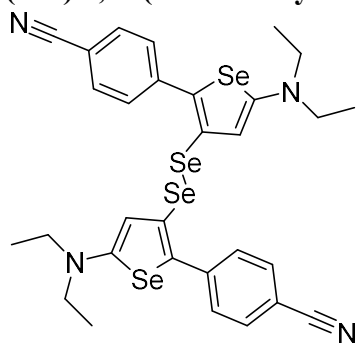

**Two-step procedure:** *Synthesis of ynamine.* Bromobutadiyne (**1a**, 0.138 g, 0.600 mmol) was dissolved in dry MeCN (10 mL) and placed in screw-sealed 20 mL vial. Next  $\text{Na}_3\text{PO}_4$  (0.197 g, 1.20 mmol) and diethyl amine (0.093 mL, 0.90 mmol) were added. Mixture was stirred at 40 °C (aluminum heating block on magnetic stirrer with heating) for 1 h and after that time 10 mL of diethyl ether was added. Reaction mixture was passed through alumina plug (basic, Brockmann grade I,  $\text{Et}_2\text{O}$ ) and next solvents were evaporated yielding ynamine as red oil. Crude ynamine was used without further purification.

*Reaction with  $\text{Na}_2\text{Se}$ .*  $\text{NaBH}_4$  (0.120 g, 3.17 mmol), selenium (0.118 g, 1.49 mmol) and water (2 mL) were placed in  $\text{N}_2$  purged Schlenk flask. The mixture was degassed with the use of *freeze-pump-thaw* technique and next stirred for 30 min. at room temperature. Next ynamine was dissolved in oxygen-free MeCN (30 mL) and added to the reaction mixture. Orange solution was stirred at 60 °C (oil bath on magnetic stirrer with heating) for 20 h under  $\text{N}_2$  atmosphere. After that time solvent was removed under reduced pressure and crude product was purified with the use of column chromatography ( $\text{Al}_2\text{O}_3$ , basic, Brockmann grade I,  $\text{CH}_2\text{Cl}_2/\text{Et}_2\text{O}$ ; v/v; 4/1 to pure  $\text{Et}_2\text{O}$ ). Pure **3aa** was obtained as red solid (0.153 g, 0.201 mmol), yield: 67%.

**Single step procedure:** Bromobutadiyne (**1a**, 0.138 g, 0.600 mmol) was dissolved in dry MeCN (10 mL) and placed in Schlenk flask. Next  $\text{Na}_3\text{PO}_4$  (0.197 g, 1.20 mmol) and diethyl amine (0.093 mL, 0.90 mmol) were added. Reaction mixture was stirred at 40°C for 1 h and. At the same time  $\text{NaBH}_4$  (0.120 g, 3.17 mmol), selenium (0.118 g, 1.49 mmol) and water (2 mL) were placed in second Schlenk flask, degassed by *freeze-pump-thaw* technique and stirred for 0.5 h. After that time the water solution of sodium selenide and 40 mL of degassed MeCN

were added to the first flask. Reaction mixture was heated to 60°C and stirred overnight at this temperature. After this time solvent was evaporated under reduced pressure and crude product was purified with the use of column chromatography (Al<sub>2</sub>O<sub>3</sub>, basic, Brockmann grade I, CH<sub>2</sub>Cl<sub>2</sub>) yielding pure product as a red solid (0.116 g, 0.152 mmol), yield: 51%

<sup>1</sup>H NMR (500 MHz, Chloroform-*d*) δ = 7.48 – 7.41 (m, 4H), 7.34 – 7.27 (m, 4H), 5.96 (s, 2H), 3.27 (q, *J*=7.2, 8H), 1.22 (t, *J*=7.1, 12H).

<sup>13</sup>C NMR (126 MHz, Chloroform-*d*) δ = 160.5, 141.0, 131.8, 129.2, 128.5, 124.5, 119.4, 109.8, 109.0, 48.3, 12.5.

<sup>77</sup>Se NMR (114 MHz, Chloroform-*d*) δ = 607.2 (selenophene), 446.8 (diselenide bridge).

FTIR (cm<sup>-1</sup>, ATR, Ge): 697, 737, 1089, 1176, 1208, 1414, 1435, 1506, 1538, 1596, 2218, 2854, 2924.

HRMS (ESI-TOF) *m/z*: [M+Na]<sup>+</sup> Calcd for C<sub>30</sub>H<sub>30</sub>N<sub>4</sub>NaSe<sub>4</sub> 788.9024; Found 788.9034.

Melting point range: 96-99 °C.

**(3ab) 4,4'-(Diselanediyldis(5-(piperidin-1-yl)selenophene-3,2-diyl))dibenzonitrile**

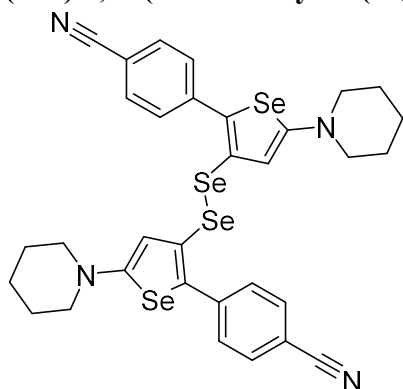

1-Bromobutadiyne (**1a**, 0.231 g, 1.00 mmol), piperidine (0.119 mL, 1.20 mmol), Na<sub>3</sub>PO<sub>4</sub> (0.395 g, 2.40 mmol) and MeCN (10 mL) were used in a first step according to the procedure for **3aa** and next crude ynamine was used without further purification. Selenium (0.238 g, 3.00 mmol), NaBH<sub>4</sub> (0.228 g, 6.02 mmol), water (2 mL) and degassed MeCN (20 mL) were used for the second step according to the procedure for **3aa**. Purification: Al<sub>2</sub>O<sub>3</sub> (basic, Brockmann grade I, hexane/CH<sub>2</sub>Cl<sub>2</sub>; v/v; 1/2 to 0/1). Orange solid (0.172 g, 0.219 mmol), yield: 44%, new compound.

$^1\text{H}$  NMR (500 MHz, Chloroform-*d*)  $\delta$  = 7.51 – 7.45 (m, 4H), 7.33 – 7.28 (m, 4H), 6.15 (s, 2H), 3.12 – 3.07 (m, 8H), 1.76 – 1.68 (m, 8H), 1.62 (tq,  $J$ =8.4, 4.4, 3.7, 4H).

$^{13}\text{C}$  NMR (126 MHz, Chloroform-*d*)  $\delta$  = 163.9, 140.9, 131.9, 131.7, 129.6, 123.9, 119.3, 112.8, 109.7, 52.6, 25.3, 23.7.

$^{77}\text{Se}$  NMR (114 MHz, Chloroform-*d*)  $\delta$  = 616.4 (selenophene), 447.6 (diselenide bridge).

FTIR ( $\text{cm}^{-1}$ , ATR, Ge): 825, 1119, 1237, 1377, 1457, 1505, 1529, 1597, 2220, 2853.

HRMS (ESI-TOF)  $m/z$ :  $[\text{M}+\text{Na}]^+$  Calcd for  $\text{C}_{32}\text{H}_{30}\text{N}_4\text{NaSe}_4$  812.9024; Found 812.9027.

Melting point range: 132-134  $^{\circ}\text{C}$ .

**(3ac) 4,4'-(Diselanediyldibis(5-(((1,3-dioxolan-2-yl)methyl)(methyl)amino)selenophene-3,2-diyl))dibenzonitrile**

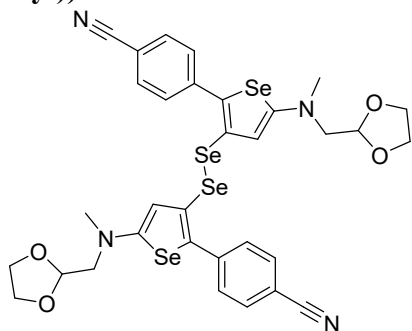

1-Bromobutadiyne (**1a**, 0.061 g, 0.27 mmol), *l*-(1,3-dioxolan-2-yl)-*N*-methylethanamine (0.046 mL, 0.40 mmol),  $\text{Na}_3\text{PO}_4$  (0.090 g, 0.531 mmol) and MeCN were used in a first step according to the procedure for **3aa** and next crude ynamine was used without further purification. Selenium (0.045 g, 0.57 mmol),  $\text{NaBH}_4$  (0.045 g, 1.21 mmol), water (1 mL) and degassed MeCN (20 mL) were used for the second step according to the procedure for **3aa**. Purification:  $\text{Al}_2\text{O}_3$  (basic, Brockmann grade I,  $\text{CH}_2\text{Cl}_2$  to  $\text{CH}_2\text{Cl}_2/\text{Et}_2\text{O}$ ; v/v; 1/1,  $\text{Et}_2\text{O}$ ). yellow solid (0.075 g, 0.088 mmol), yield: 65%, new compound.

$^1\text{H}$  NMR (500 MHz, Chloroform-*d*)  $\delta$  = 7.47 – 7.45 (m, 4H), 7.28 – 7.25 (m, 4H), 6.00 (s, 2H), 5.10 (t,  $J$  = 3.9 Hz, 2H), 4.05 – 3.95 (m, 4H), 3.93– 3.89 (m, 4H), 3.40 (d,  $J$  = 3.9 Hz, 4H), 3.02 (s, 6H).

$^{13}\text{C}$  NMR (126 MHz, Chloroform-*d*)  $\delta$  = 161.9, 140.8, 131.8, 130.7, 129.5, 123.9, 119.4, 110.8, 109.3, 101.9, 65.3, 59.3, 42.1.

$^{77}\text{Se}$  NMR (114 MHz, Chloroform-*d*)  $\delta$  = 611.2 (selenophene), 444.9 (diselenide bridge).

FTIR ( $\text{cm}^{-1}$ , ATR, diamond): 734, 837, 1037, 1096, 1144, 1357, 1417, 1430, 1507, 1539, 1596, 2221, 2888, 3078.

HRMS (ESI-TOF)  $m/z$ :  $[\text{M}+\text{Na}]^+$  Calcd for  $\text{C}_{32}\text{H}_{30}\text{N}_4\text{O}_4\text{NaSe}_4$  876.8820; Found 876.8825.

Melting point range: 142-143  $^{\circ}\text{C}$ .

**(3ad) 4,4'-(Diselanediyldibis(5-(benzyl(methyl)amino)selenophene-3,2-diyl))dibenzonitrile**

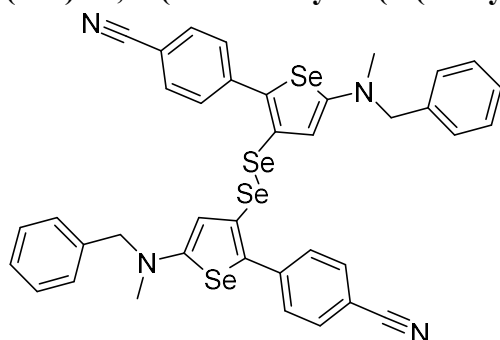

1-Bromobutadiyne (**1a**, 0.154 g, 0.669 mmol), *N*-methylbenzylamine (0.13 mL, 1.01 mmol),  $\text{Na}_3\text{PO}_4$  (0.219 g, 1.34 mmol) and MeCN were used in a first step according to the procedure for **3aa** and next crude ynamine was used without further purification. Selenium (132 mg, 1.67 mmol),  $\text{NaBH}_4$  (0.134 g, 3.48 mmol), water (1 mL) and degassed MeCN (20 mL) were used for the second step according to the procedure for **3aa**. Purification:  $\text{Al}_2\text{O}_3$  (basic, Brockmann grade I,  $\text{CH}_2\text{Cl}_2$  to  $\text{CH}_2\text{Cl}_2/\text{THF}$ ; v/v; 5/1). Red solid (0.177 g, 0.206 mmol), yield: 62%, new compound.

$^1\text{H}$  NMR (500 MHz, Chloroform-*d*)  $\delta$  = 7.45 – 7.42 (m, 4H), 7.38 – 7.27 (m, 14H), 6.06 (s, 2H), 4.39 (s, 4H), 2.93 (s, 6H).

$^{13}\text{C}$  NMR (126 MHz, Chloroform-*d*)  $\delta$  = 162.0, 140.7, 136.4, 131.7, 129.9, 129.3, 128.9, 127.9, 127.5, 124.2, 119.2, 110.8, 109.3, 60.4, 40.5.

$^{77}\text{Se}$  NMR (114 MHz, Chloroform-*d*)  $\delta$  = 612.2 (selenophene), 447.3 (diselenide bridge).

FTIR ( $\text{cm}^{-1}$ , ATR, Ge): 732, 827, 1100, 1113, 1357, 1378, 1448, 1510, 1539, 1598, 2222, 2929, 2971.

HRMS (ESI-TOF)  $m/z$ :  $[\text{M}+\text{Na}]^+$  Calcd for  $\text{C}_{38}\text{H}_{30}\text{N}_4\text{NaSe}_4$  884.9029; Found 884.9030.

Melting point range: 137-140  $^{\circ}\text{C}$ .



**(3bb) 1,2-Bis(2-(4-fluorophenyl)-5-(piperidin-1-yl)selenophen-3-yl)diselane**

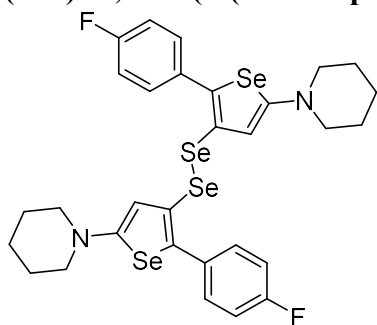

1-Bromobutadiyne (**1b**, 0.063 g, 0.24 mmol), piperidine (0.04 mL, 0.28 mmol), Na<sub>3</sub>PO<sub>4</sub> (0.096 g, 0.57 mmol) and MeCN (10 mL) were used in a first step according to the procedure for **3aa** and next crude ynamine was used without further purification. Selenium (0.054 g, 0.69 mmol), NaBH<sub>4</sub> (0.051 g, 1.38 mmol), water (1 mL) and degassed MeCN (20 mL) were used for the second step according to the procedure for **3aa**. Purification: Al<sub>2</sub>O<sub>3</sub> (basic, Brockmann grade I, Et<sub>2</sub>O). Orange solid (0.058 g, 0.075 mmol), yield: 63%, new compound.

<sup>1</sup>H NMR (500 MHz, Chloroform-*d*) δ 7.22 – 7.18 (m, 4H), 6.97 – 6.92 (m, 4H), 6.17 (s, 2H), 3.08 – 3.04 (m, 8H), 1.73 – 1.68 (m, 8H), 1.61 – 1.56 (m, 4H).

<sup>13</sup>C NMR (126 MHz, Chloroform-*d*) δ 162.8, 162.1 (C-F, <sup>1</sup>J<sub>CF</sub> = 247.4 Hz), 133.4, 132.4 (C-F, <sup>4</sup>J<sub>CF</sub> = 3.4 Hz), 131.3 (C-F, <sup>3</sup>J<sub>CF</sub> = 7.9 Hz), 122.0, 115.1 (C-F, <sup>2</sup>J<sub>CF</sub> = 21.6 Hz), 112.4, 52.9, 25.4, 23.8.

<sup>77</sup>Se NMR (114 MHz, Chloroform-*d*) δ = 615.3, 441.0.

FTIR (cm<sup>-1</sup>, ATR, diamond): 826, 1233, 1381, 1447, 1509, 2855, 2938.

HRMS (ESI-TOF) *m/z*: [M+H]<sup>+</sup> Calcd for C<sub>30</sub>H<sub>31</sub>F<sub>2</sub>N<sub>2</sub>Se<sub>4</sub> 776.9116; Found 776.9111.

Melting point range: 134-137 °C.

**(4cb) Ethyl (Z)-2-(5-(piperidin-1-yl)-3H-1,2-diselenol-3-ylidene)acetate**

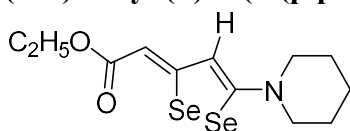

1-Bromobutadiyne (**1c**, 0.050 g, 0.276 mmol), piperidine (0.041 mL, 0.414 mmol), Na<sub>3</sub>PO<sub>4</sub> (0.094 g, 0.552 mmol) and MeCN were used in a first step according to the procedure for **3aa** and next crude ynamine was used without further purification. Selenium (0.054 g, 0.69 mmol), NaBH<sub>4</sub> (0.054 g, 1.46 mmol), water (1 mL) and degassed MeCN (20 mL) were used

for the second step according to the procedure for **3aa**. Purification: Al<sub>2</sub>O<sub>3</sub> (basic, Brockmann grade I, Et<sub>2</sub>O). Orange solid (0.043 g, 0.118 mmol), yield: 43%, new compound.

<sup>1</sup>H NMR (500 MHz, Chloroform-*d*)  $\delta$  = 6.57 (s, 1H), 6.12 (s, 1H), 4.21 (q, *J* = 7.1 Hz, 2H), 3.45 – 3.40 (m, 4H), 1.68 (dd, *J* = 10.7, 5.8 Hz, 4H), 1.65 – 1.61 (m, 2H), 1.29 (t, *J* = 7.1 Hz, 3H).

<sup>13</sup>C NMR (126 MHz, Chloroform-*d*)  $\delta$  = 172.2, 170.1, 168.7, 102.1, 96.9, 60.2, 53.0, 25.6, 23.9, 14.8.

<sup>77</sup>Se NMR (114 MHz, Chloroform-*d*)  $\delta$  = 644.0, 391.6.

FTIR (cm<sup>-1</sup>, ATR, diamond): 1045, 1119, 1143, 1301, 1403, 1443, 1483, 1607, 1730, 2854, 2933.

HRMS (ESI-TOF) *m/z*: [M+H]<sup>+</sup> Calcd for C<sub>12</sub>H<sub>18</sub>NO<sub>2</sub>Se<sub>2</sub> 367.9668; Found 367.9660.

Melting point range: 139 -142 °C.

**(4cc) Ethyl (Z)-2-(5-(((1,3-dioxolan-2-yl)methyl)(methyl)amino)-3H-1,2-diselenol-3-ylidene)acetate**

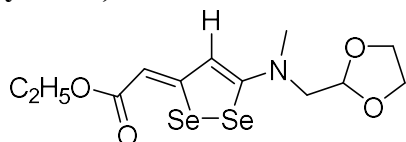

1-Bromobutadiyne (**1c**, 0.074 g, 0.40 mmol), 1-(1,3-dioxolan-2-yl)-*N*-methylethanamine (0.69 mL, 0.60 mmol), Na<sub>3</sub>PO<sub>4</sub> (0.137 g, 0.806 mmol) and MeCN were used in a first step according to the procedure for **3aa** and next crude ynamine was used without further purification. Selenium (0.066 g, 0.841 mmol), NaBH<sub>4</sub> (0.064 g, 1.749 mmol), water (1 mL) and degassed MeCN (20 mL) were used for the second step according to the procedure for **3aa**. Purification: Al<sub>2</sub>O<sub>3</sub> (basic, Brockmann grade I, Et<sub>2</sub>O). Orange oil (0.062 g, 0.16 mmol), yield: 40%, new compound.

<sup>1</sup>H NMR (500 MHz, Chloroform-*d*)  $\delta$  = 6.52 (s, 1H), 6.14 (s, 1H), 5.09 (t, *J* = 4.0 Hz, 1H), 4.22 (q, *J* = 7.1 Hz, 2H), 3.99 (dd, *J* = 8.8, 5.2 Hz, 2H), 3.89 (dd, *J* = 7.7, 6.2 Hz, 2H), 3.57 (d, *J* = 4.0 Hz, 2H), 3.19 (s, 3H), 1.30 (t, *J* = 7.1 Hz, 4H).

$^{13}\text{C}$  NMR (126 MHz, Chloroform-*d*)  $\delta$  172.4, 170.1, 168.3, 102.3, 102.2, 96.8, 65.3, 60.3, 59.6, 43.1, 14.8.

$^{77}\text{Se}$  NMR (114 MHz, Chloroform-*d*)  $\delta$  = 668.4, 388.1.

FTIR ( $\text{cm}^{-1}$ , ATR, diamond): 1041, 1142, 1245, 1315, 1393, 1476, 1603, 1690, 2891.

HRMS (ESI-TOF)  $m/z$ :  $[\text{M}+\text{Na}]^+$  Calcd for  $\text{C}_{12}\text{H}_{17}\text{NO}_4\text{NaSe}_2$  421.9386; Found 421.9383.

**(5ab) 4-(5-(Piperidin-1-yl)tellurophen-2-yl)benzonitrile**

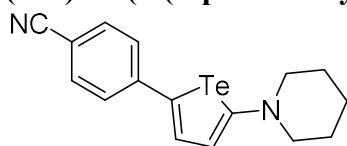

1-Bromobutadiyne (**1a**, 0.069 g, 0.30 mmol), piperidine (0.042 mL, 0.36 mmol),  $\text{Na}_3\text{PO}_4$  (0.123 g, 0.750 mmol) and MeCN (10 mL) were used in a first step according to the procedure for **3aa** and next crude ynamine was used without further purification. Tellurium (0.084 g, 0.66 mmol),  $\text{NaBH}_4$  (0.059 g, 1.56 mmol), water (1 mL) and degassed MeCN (20 mL) were used for the second step according to the procedure for **3aa**. Purification:  $\text{Al}_2\text{O}_3$  (basic, Brockmann grade I, hexane/ $\text{CH}_2\text{Cl}_2$ ; v/v; 2/1 to 0/1). Yellow solid (0.045 g, 0.12 mmol), yield: 40%, new compound.

$^1\text{H}$  NMR (500 MHz, Chloroform-*d*)  $\delta$  = 7.61 (d,  $J$  = 4.8 Hz, 1H), 7.51 – 7.48 (m, 2H), 7.33 – 7.30 (m, 2H), 6.24 (d,  $J$  = 4.8 Hz, 1H), 3.18 – 3.14 (m, 4H), 1.73 – 1.70 (m, 4H), 1.62 – 1.60 (m, 2H).

$^{13}\text{C}$  NMR (126 MHz, Chloroform-*d*)  $\delta$  = 165.2, 145.3, 135.8, 132.6, 126.7, 125.4, 119.6, 112.0, 107.9, 55.1, 25.5, 23.9.

FTIR ( $\text{cm}^{-1}$ , ATR, diamond): 765, 824, 1118, 1234, 1444, 1375, 1596, 2213, 2857, 2940.

HRMS (ESI-TOF)  $m/z$ :  $[\text{M}+\text{H}]^+$  Calcd for  $\text{C}_{16}\text{H}_{17}\text{N}_2\text{Te}$  367.0454; Found 367.0440.

Melting point range: 184-186 °C

**(5ac) 4-(5-(((1,3-Dioxolan-2-yl)methyl)(methyl)amino)tellurophen-2-yl)benzonitrile**

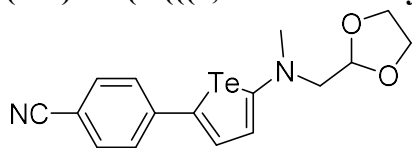

1-Bromobutadiyne (**1a**, 0.069 g, 0.30 mmol), 1-(1,3-dioxolan-2-yl)-*N*-methylethanamine (0.041 mL, 0.36 mmol), Na<sub>3</sub>PO<sub>4</sub> (0.118 g, 0.72 mmol) and MeCN (10 mL) were used in a first step according to the procedure for **3aa** and next crude ynamine was used without further purification. Tellurium (0.084 g, 0.66 mmol), NaBH<sub>4</sub> (0.059 g, 1.56 mmol), water (1 mL) and degassed MeCN (20 mL) were used for the second step according to the procedure for **3aa**. Purification: Al<sub>2</sub>O<sub>3</sub> (basic, Brockmann grade I, hexane/CH<sub>2</sub>Cl<sub>2</sub>; v/v; 2/1 to 0/1). Yellow solid (0.061 g, 0.15 mmol), yield: 50%, new compound.

<sup>1</sup>H NMR (500 MHz, Chloroform-*d*)  $\delta$  = 7.62 (d, *J* = 4.8 Hz, 1H), 7.49 – 7.46 (m, 2H), 7.31 – 7.27 (m, 2H), 6.07 (d, *J* = 4.8 Hz, 1H), 5.13 (t, *J* = 3.8 Hz, 1H), 4.03 – 3.98 (m, 2H), 3.89 – 3.87 (m, 2H), 3.45 (d, *J* = 3.8 Hz, 2H), 3.10 (s, 3H).

<sup>13</sup>C NMR (126 MHz, Chloroform-*d*)  $\delta$  162.6, 145.4, 136.1, 132.7, 125.3, 125.2, 119.7, 110.3, 107.7, 102.5, 65.3, 61.5, 44.2.

FTIR (cm<sup>-1</sup>, ATR, diamond): 753, 829, 1036, 1283, 1409, 1503, 1598, 2219, 2897, 2963.

HRMS (ESI-TOF) *m/z*: [M+Na]<sup>+</sup> Calcd for C<sub>16</sub>H<sub>16</sub>N<sub>2</sub>O<sub>2</sub>NaTe 421.0172; Found 421.0169.

Melting point range: 175-178 °C

**(5ad) 4-(5-(Benzyl(methyl)amino)tellurophen-2-yl)benzonitrile**

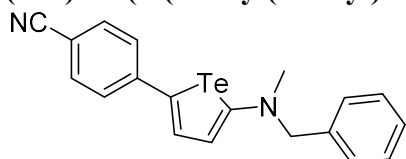

1-Bromobutadiyne (**1a**, 0.231 g, 1.00 mmol), *N*-benzylmethylethanamine (0.155 mL, 1.20 mmol), Na<sub>3</sub>PO<sub>4</sub> (0.412 g, 2.51 mmol) and MeCN (10 mL) were used in a first step according to the procedure for **3aa** and next crude ynamine was used without further purification. Tellurium (0.282 g, 2.21 mmol), NaBH<sub>4</sub> (0.198 g, 5.22 mmol), water (2 mL) and degassed MeCN (20 mL) were used for the second step according to the procedure for **3aa**. Purification: Al<sub>2</sub>O<sub>3</sub>

(basic, Brockmann grade I, hexane/CH<sub>2</sub>Cl<sub>2</sub>; v/v; 2/1 to 0/1). Orange oil (0.143 g, 0.357 mmol), yield: 36%, new compound.

<sup>1</sup>H NMR (500 MHz, Chloroform-*d*)  $\delta$  = 7.62 (d, *J* = 4.8 Hz, 1H), 7.49 – 7.46 (m, 2H), 7.35 – 7.33 (m, 3H), 7.29 – 7.25 (m, 4H), 6.08 (d, *J* = 4.8 Hz, 1H), 4.47 (s, 2H), 3.06 (s, 3H).

<sup>13</sup>C NMR (126 MHz, Chloroform-*d*)  $\delta$  162.4, 145.3, 136.6, 136.0, 132.7, 129.0, 128.0, 127.5, 125.5, 125.2, 119.7, 110.4, 107.7, 62.8, 42.7.

FTIR (cm<sup>-1</sup>, ATR, diamond): 740, 826, 1068, 1291, 1410, 1503, 1598, 1626, 2217, 2938, 3030.

HRMS (ESI-TOF) *m/z*: [M+Na]<sup>+</sup> Calcd for C<sub>19</sub>H<sub>16</sub>N<sub>2</sub>TeNa 425.0273; Found 425.0260.

**(5ae) 4-(5-Morpholinotellurophen-2-yl)benzonitrile**

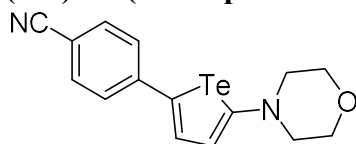

1-Bromobutadiyne (**1a**, 0.088 g, 0.38 mmol), morpholine (0.051 mL, 0.57 mmol), Na<sub>3</sub>PO<sub>4</sub> (0.131 g, 0.772 mmol) and MeCN (10 mL) were used in a first step according to the procedure for **3aa** and next crude ynamine was used without further purification. Tellurium (0.120 g, 0.940 mmol), NaBH<sub>4</sub> (0.074 g, 1.99 mmol), water (1 mL) and degassed MeCN (20 mL) were used for the second step according to the procedure for **3aa**. Purification: Al<sub>2</sub>O<sub>3</sub> (basic, Brockmann grade I, Et<sub>2</sub>O). Yellow solid (0.103 g, 0.282 mmol), yield: 74%, new compound.

<sup>1</sup>H NMR (500 MHz, Chloroform-*d*)  $\delta$  = 7.62 (d, *J* = 4.7 Hz, 1H), 7.53 – 7.50 (m, 2H), 7.37 – 7.34 (m, 2H), 6.37 (d, *J* = 4.8 Hz, 1H), 3.85 – 3.82 (m, 4H), 3.16 – 3.13 (m, 4H).

<sup>13</sup>C NMR (126 MHz, Chloroform-*d*)  $\delta$  = 164.8, 144.9, 135.2, 132.6, 129.1, 125.8, 119.4, 113.4, 108.7, 66.4, 53.7.

FTIR (cm<sup>-1</sup>, ATR, diamond): 548, 760, 1110, 1205, 1492, 1595, 2213, 2846, 2918, 2983.

HRMS (ESI-TOF) *m/z*: [M+H]<sup>+</sup> Calcd for C<sub>15</sub>H<sub>14</sub>N<sub>2</sub>OTe 368.0168; Found 368.0170.

Melting point range: 191-194°C.

### 3. X-Ray Crystallography Details

All monocrystals used for X-ray measurements were grown by slow evaporation of  $\text{CH}_2\text{Cl}_2/n$ -hexane solutions placed in 10 mL vials. Vials were closed using polypropylene caps with short needle pierced through the cap.

Table S1. X-ray crystallography details.

|                                                                            | <b>3aa</b>                                                             | <b>3ab</b>                                        | <b>4cb</b>                                         |
|----------------------------------------------------------------------------|------------------------------------------------------------------------|---------------------------------------------------|----------------------------------------------------|
| Chemical formula                                                           | $\text{C}_{30}\text{H}_{30}\text{N}_4\text{Se}_4$                      | $\text{C}_{32}\text{H}_{30}\text{N}_4\text{Se}_4$ | $\text{C}_{12}\text{H}_{17}\text{NO}_2\text{Se}_2$ |
| $M_r$                                                                      | 762.42                                                                 | 786.44                                            | 365.18                                             |
| Crystal system, space group                                                | Monoclinic, $P2_1/c$                                                   | Monoclinic, $P2_1/c$                              | Monoclinic, $P2_1/c$                               |
| Temperature (K)                                                            | 100                                                                    | 100                                               | 100                                                |
| $a, b, c$ (Å)                                                              | 14.742 (4), 7.523 (2), 26.893 (7)                                      | 5.4827 (2), 27.7015 (6), 19.6107 (5)              | 7.915 (2), 15.836 (4), 11.278 (3)                  |
| $\alpha, \beta, \gamma$ (°)                                                | 90, 95.83 (3), 90                                                      | 90, 95.339 (2), 90                                | 90, 109.84 (3), 90                                 |
| $V$ (Å <sup>3</sup> )                                                      | 2967.1 (14)                                                            | 2965.53 (15)                                      | 1329.7 (6)                                         |
| $Z$                                                                        | 4                                                                      | 4                                                 | 4                                                  |
| Radiation type                                                             | Mo $K\alpha$                                                           | Mo $K\alpha$                                      | Mo $K\alpha$                                       |
| $\mu$ (mm <sup>-1</sup> )                                                  | 4.97                                                                   | 4.98                                              | 5.55                                               |
| Crystal size (mm)                                                          | $0.9 \times 0.8 \times 0.34$                                           | $0.71 \times 0.13 \times 0.10$                    | $0.50 \times 0.32 \times 0.06$                     |
| Diffractometer                                                             | Kuma KM-4 CCD                                                          | Kuma KM-4 CCD                                     | Kuma KM4 CCD                                       |
| Absorption correction                                                      | Analytical                                                             | Analytical                                        | Analytical                                         |
| No. of measured, independent and observed [ $I > 2\sigma(I)$ ] reflections | 20533, 7278, 3552                                                      | 26724, 6728, 5482                                 | 17242, 5595, 3996                                  |
| $R_{\text{int}}$                                                           | 0.163                                                                  | 0.069                                             | 0.078                                              |
| $(\sin \theta/\lambda)_{\text{max}}$ (Å <sup>-1</sup> )                    | 0.678                                                                  | 0.651                                             | 0.845                                              |
| $R[F^2 > 2\sigma(F^2)], wR(F^2), S$                                        | 0.097, 0.280, 1.03                                                     | 0.058, 0.157, 1.11                                | 0.058, 0.166, 1.01                                 |
| No. of reflections                                                         | 7278                                                                   | 6728                                              | 5595                                               |
| No. of parameters                                                          | 350                                                                    | 361                                               | 155                                                |
| H-atom treatment                                                           | H atoms treated by a mixture of independent and constrained refinement | H-atom parameters constrained                     | H-atom parameters constrained                      |
| $\Delta\rho_{\text{max}}, \Delta\rho_{\text{min}}$ (e Å <sup>-3</sup> )    | 1.50, -1.37                                                            | 1.26, -0.70                                       | 1.86, -2.34                                        |

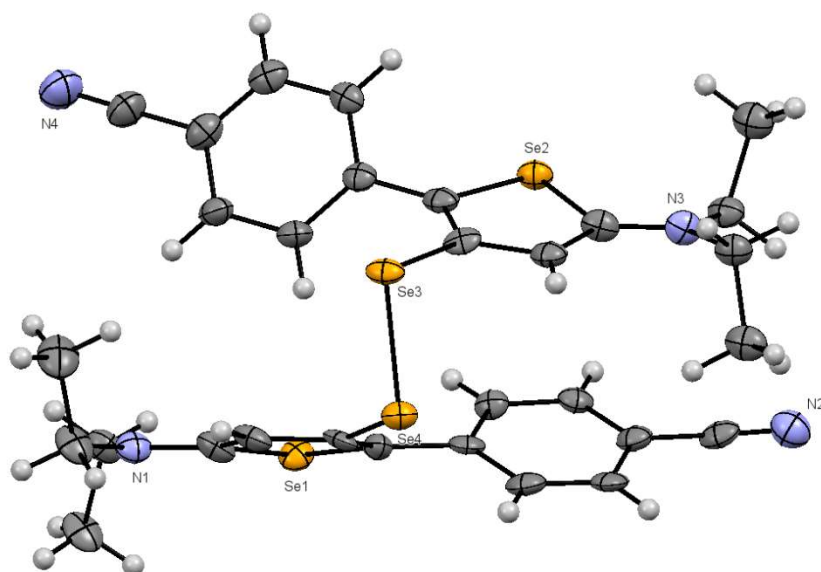

**Figure S1.** Molecular structure of **3aa**; thermal ellipsoids set at 50% probability.

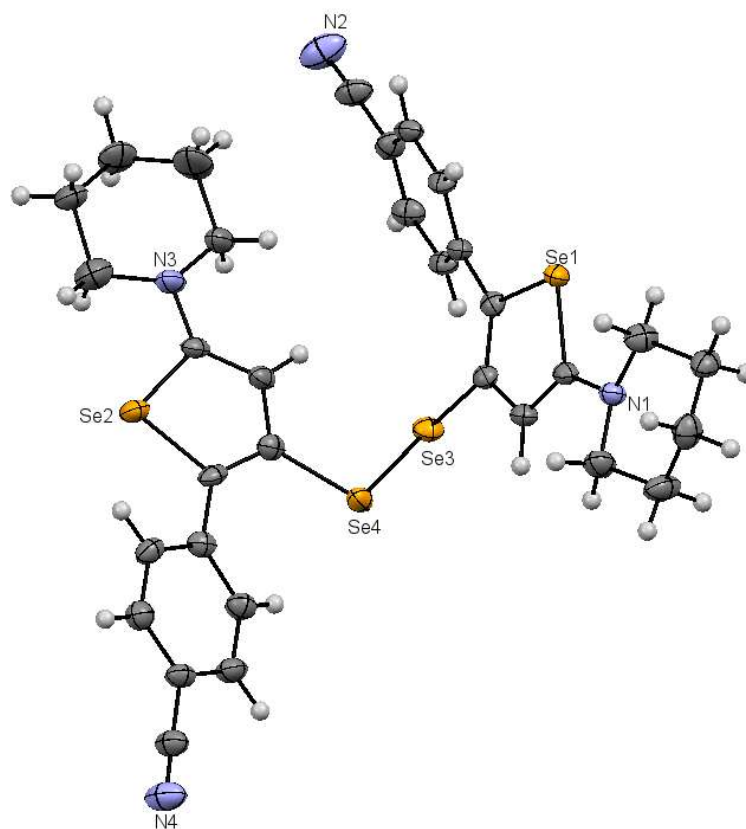

**Figure S2.** Molecular structure of **3ab**; thermal ellipsoids set at 50% probability.

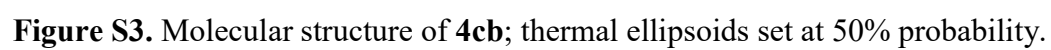



## 4. NMR spectra

### (3aa) 4,4'-(Diselanediyldis(5-(diethylamino)selenophene-3,2-diyl))dibenzonitrile

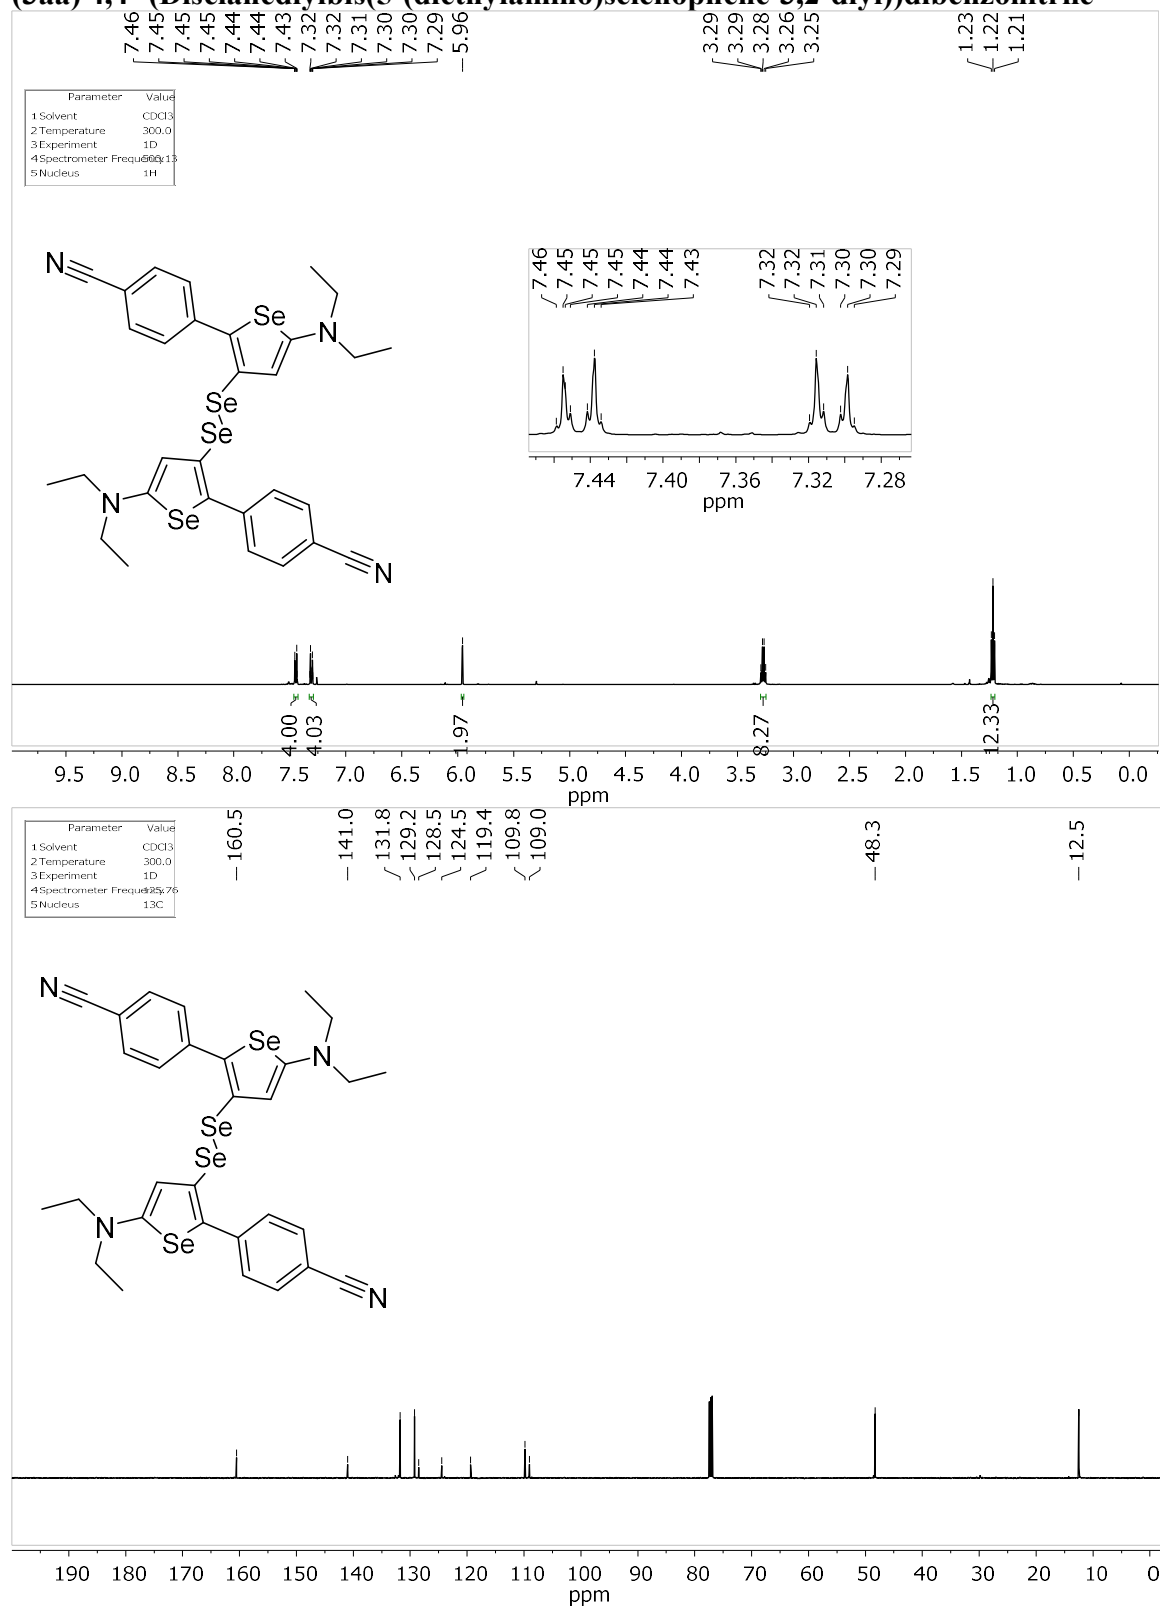

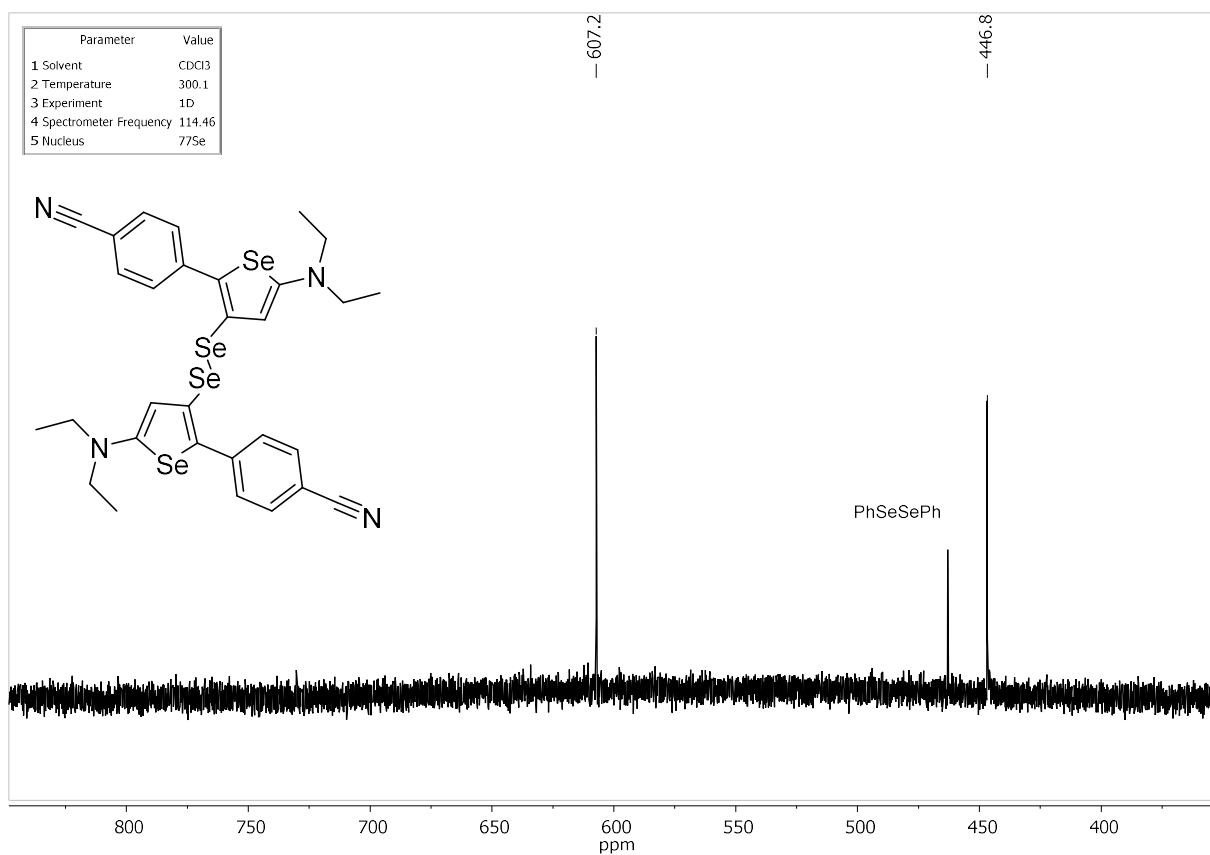

**(3ab) 4,4'-(Diselanediyldibis(5-(piperidin-1-yl)selenophene-3,2-diyl)dibenzonitrile**

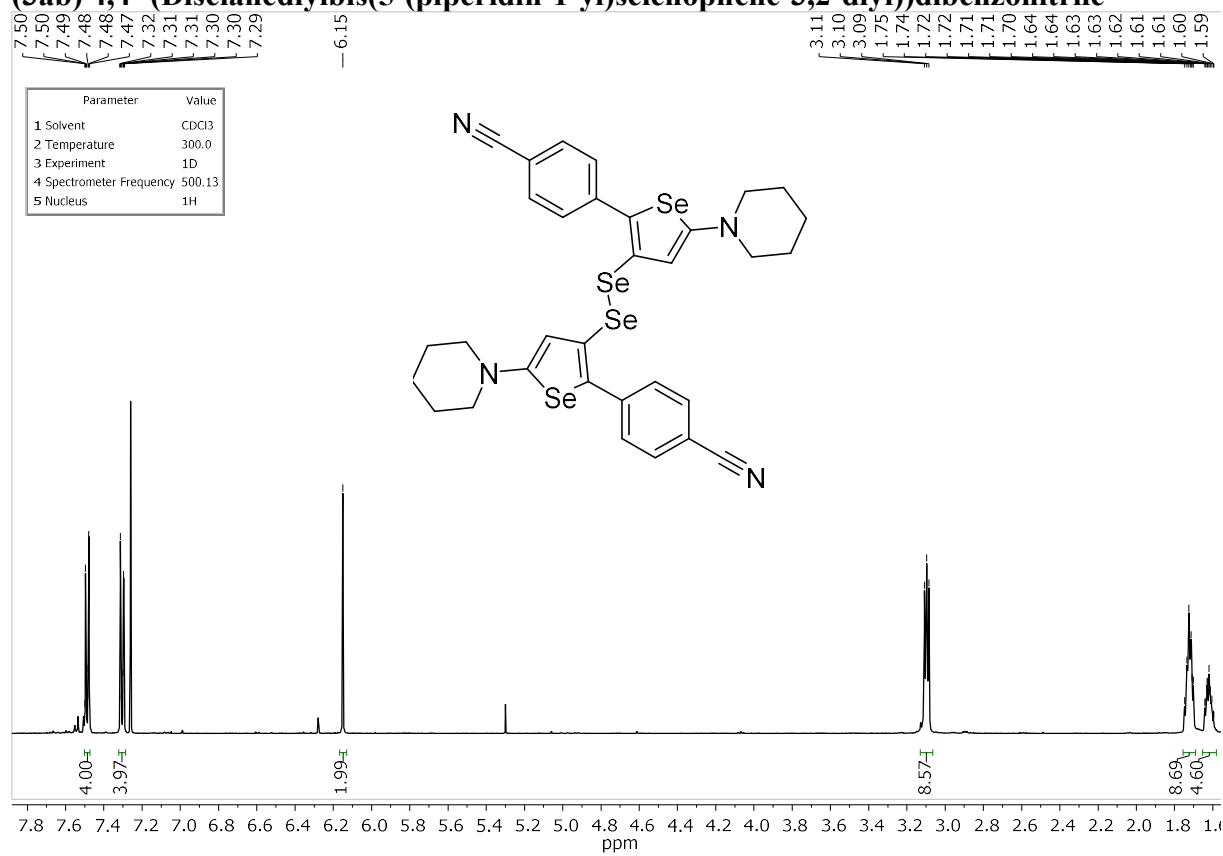

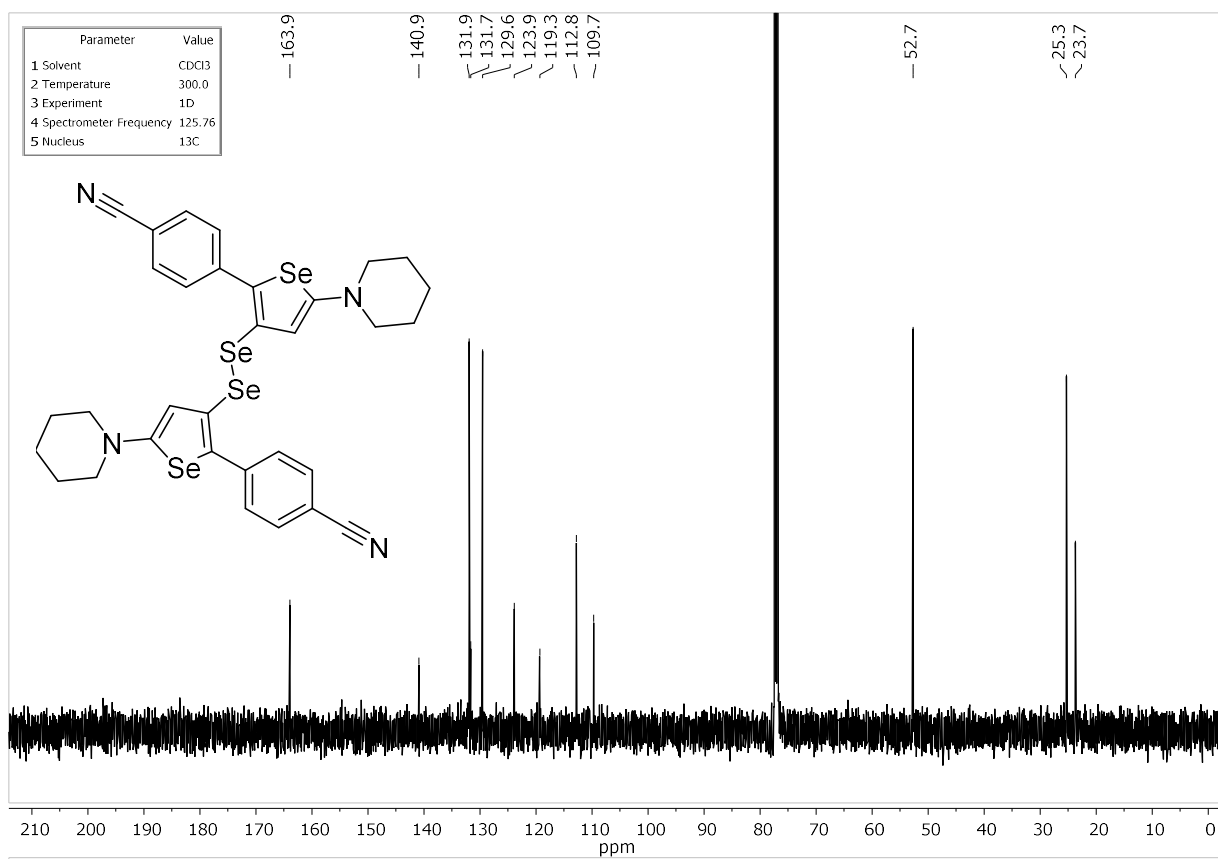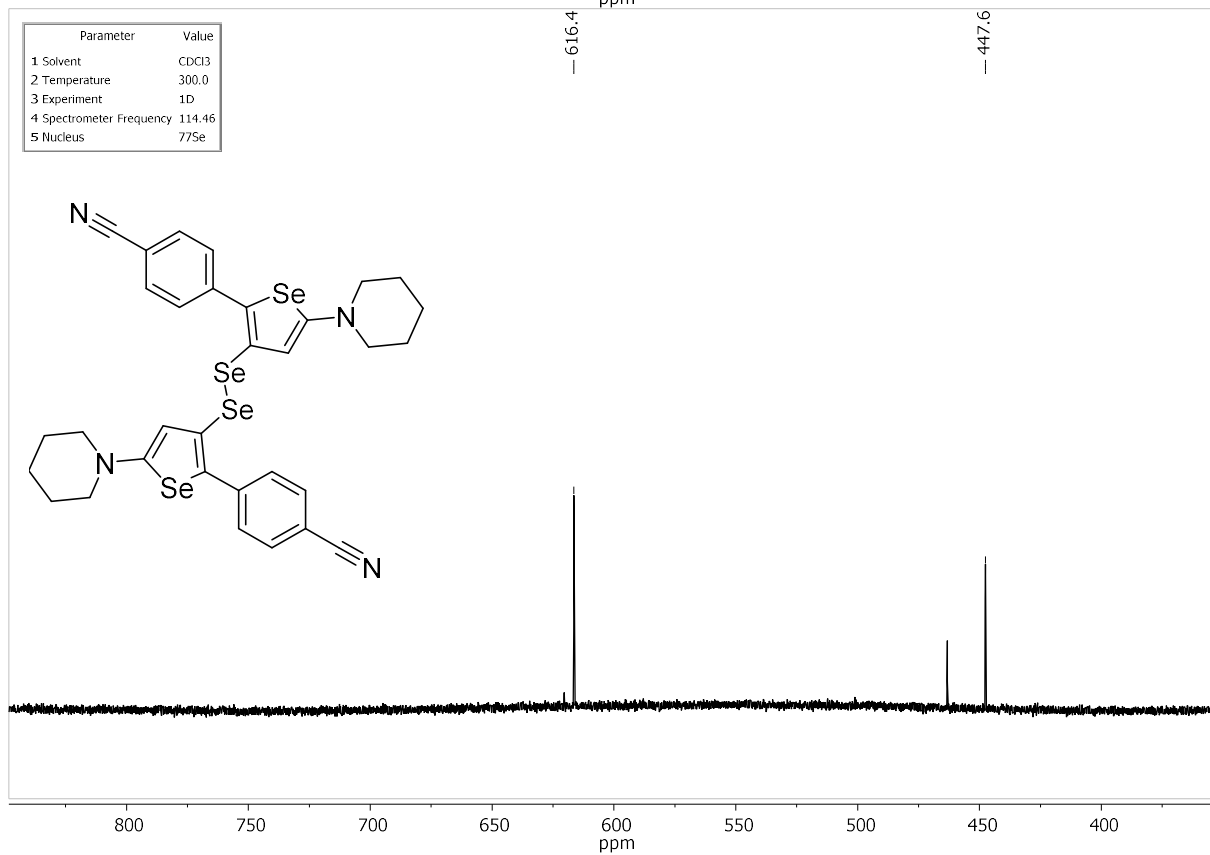

**(3ac) 4,4'-(Diselanediylbis(5-(((1,3-dioxolan-2-yl)methyl)(methyl)amino)selenophene-3,2-diyl))dibenzonitrile**

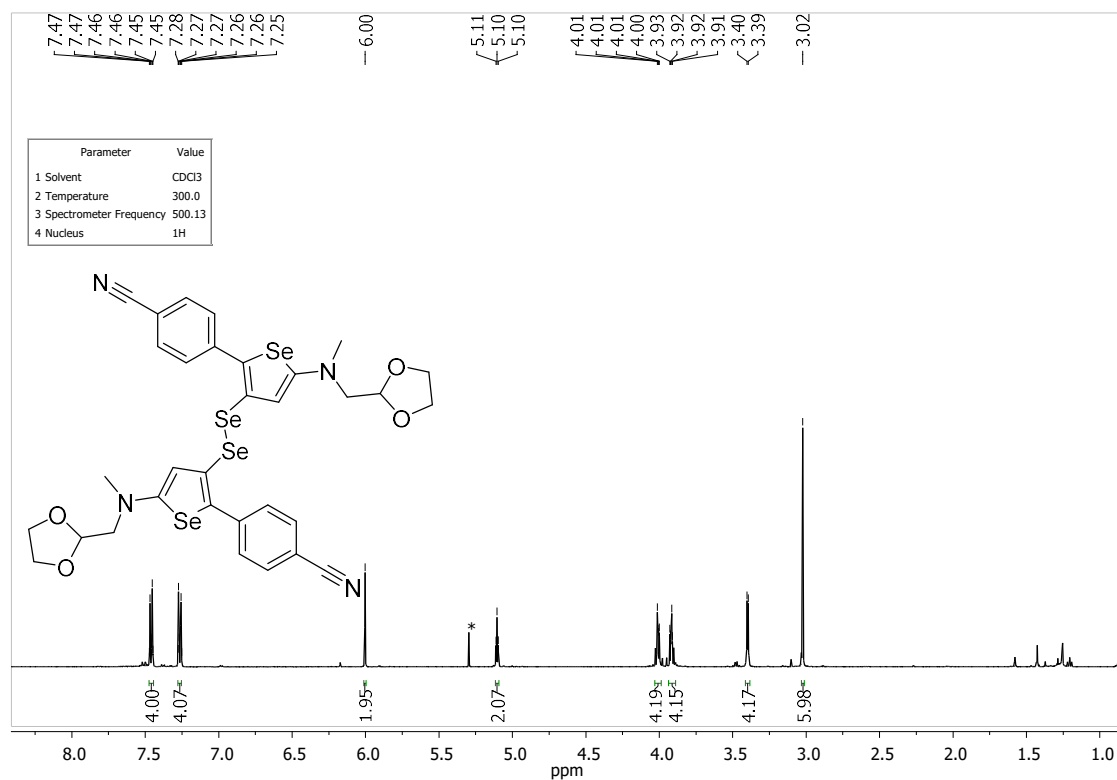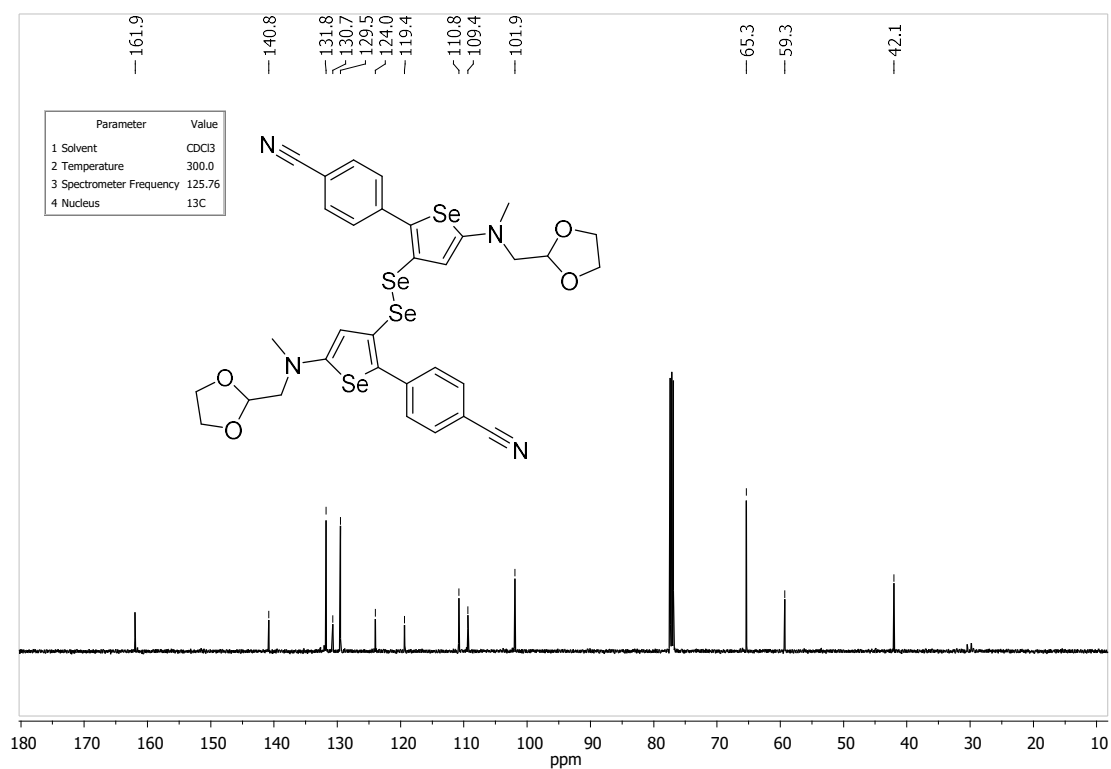

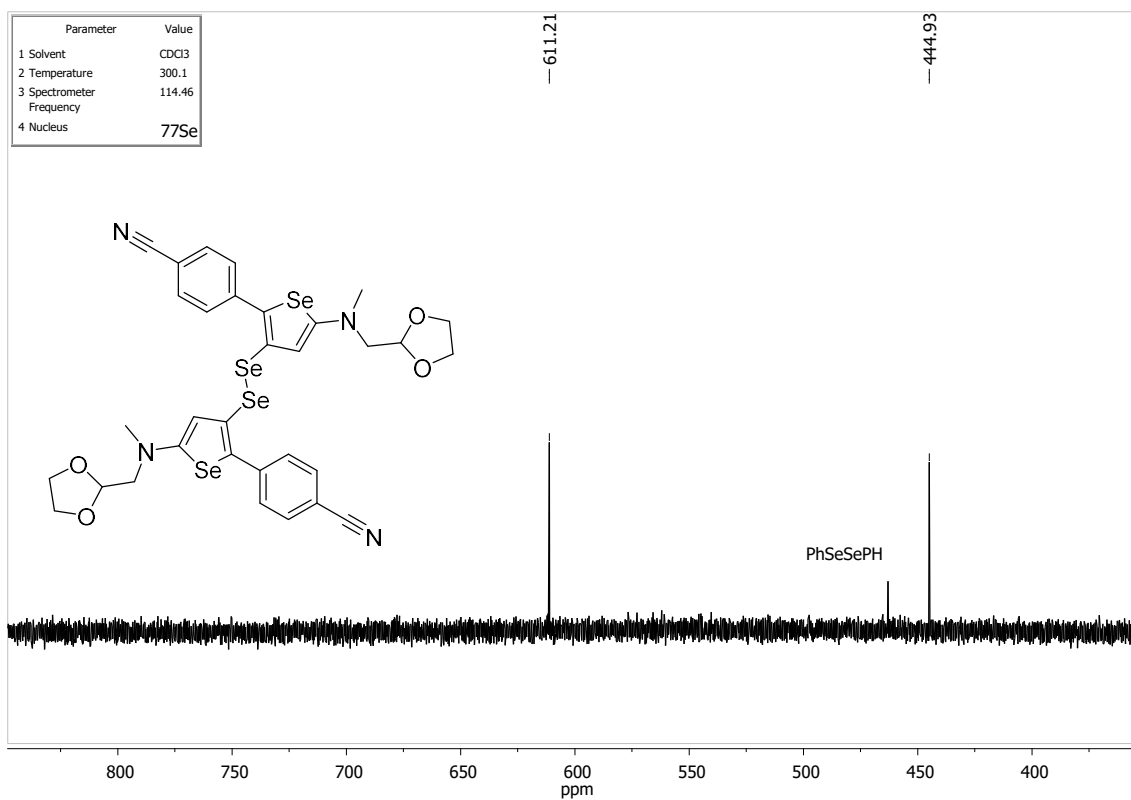

**(3ad) 4,4'-(Diselanediyldibis(5-(benzyl(methyl)amino)selenophene-3,2-diyl))dibenzonitrile**

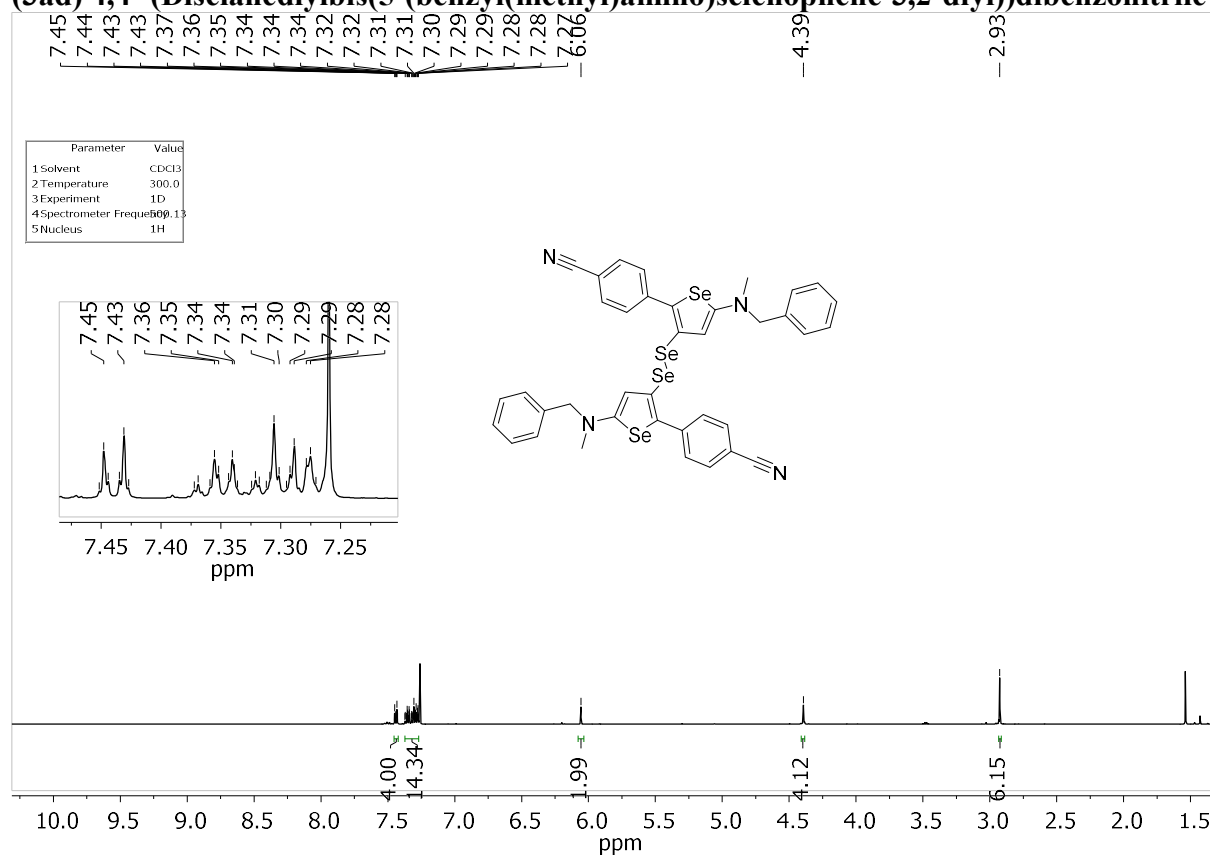

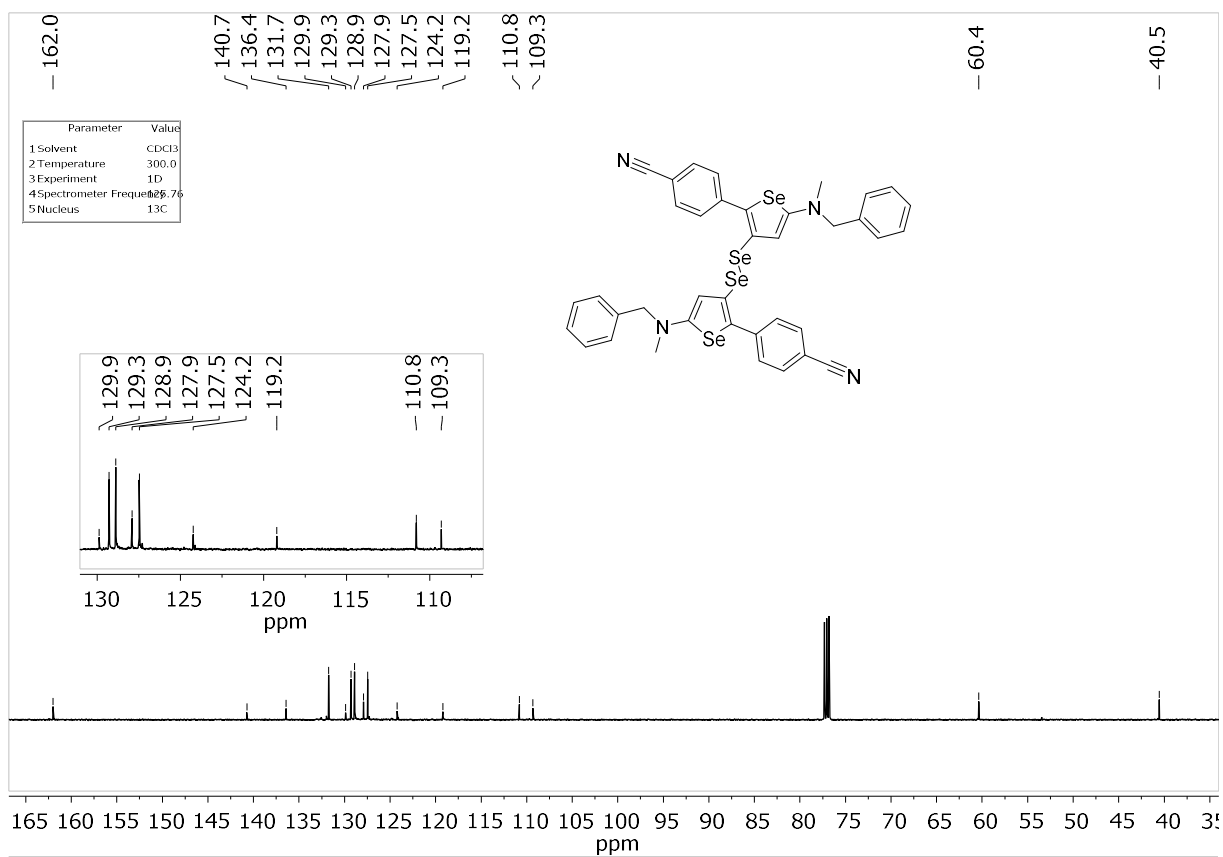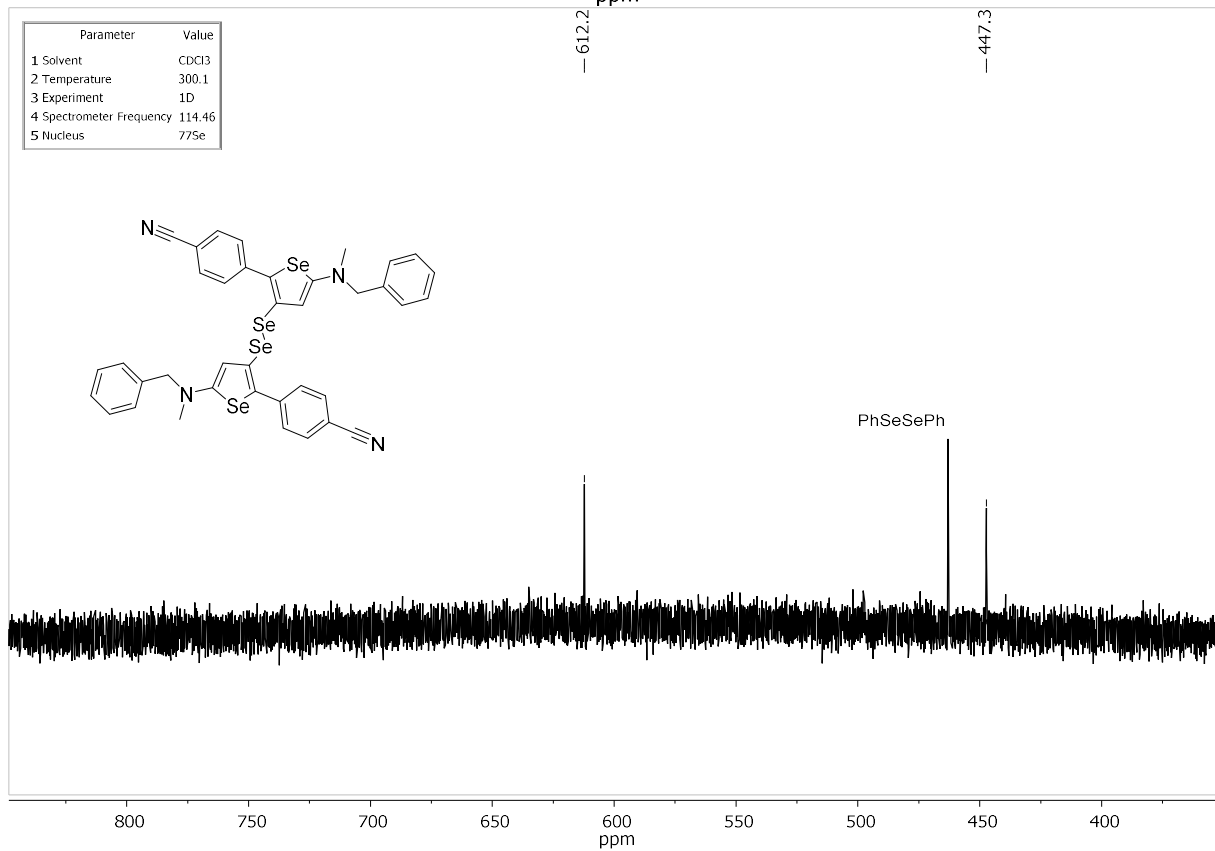

**(3bb) 1,2-Bis(2-(4-fluorophenyl)-5-(piperidin-1-yl)selenophen-3-yl)dislane**

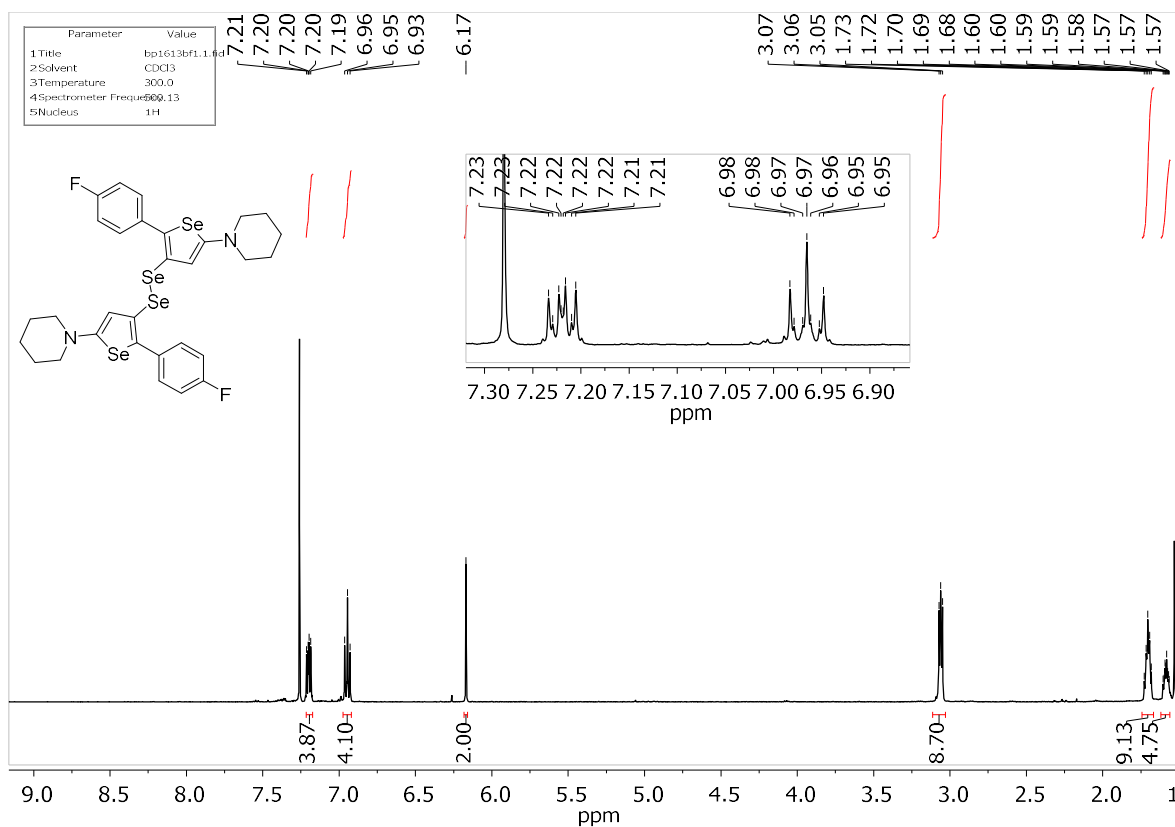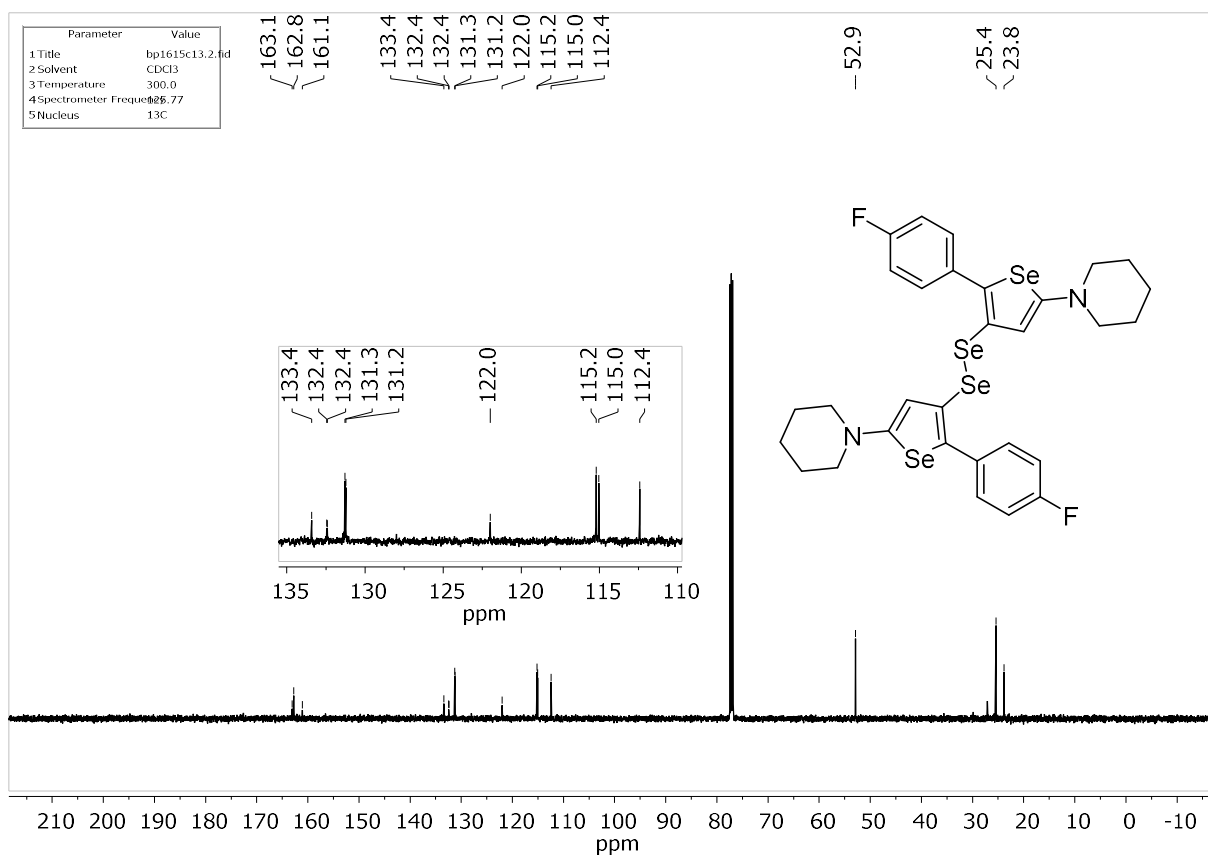

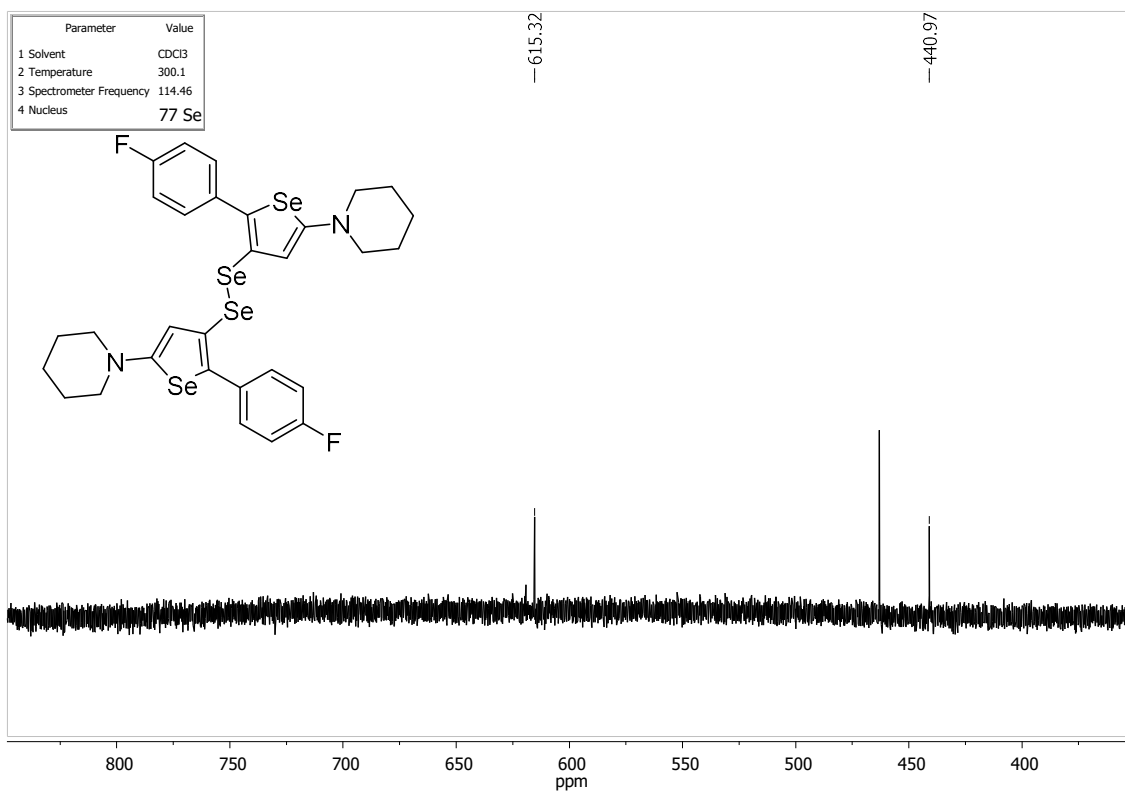

**(4cb) Ethyl (Z)-2-(5-(piperidin-1-yl)-3H-1,2-diselenol-3-ylidene)acetate**

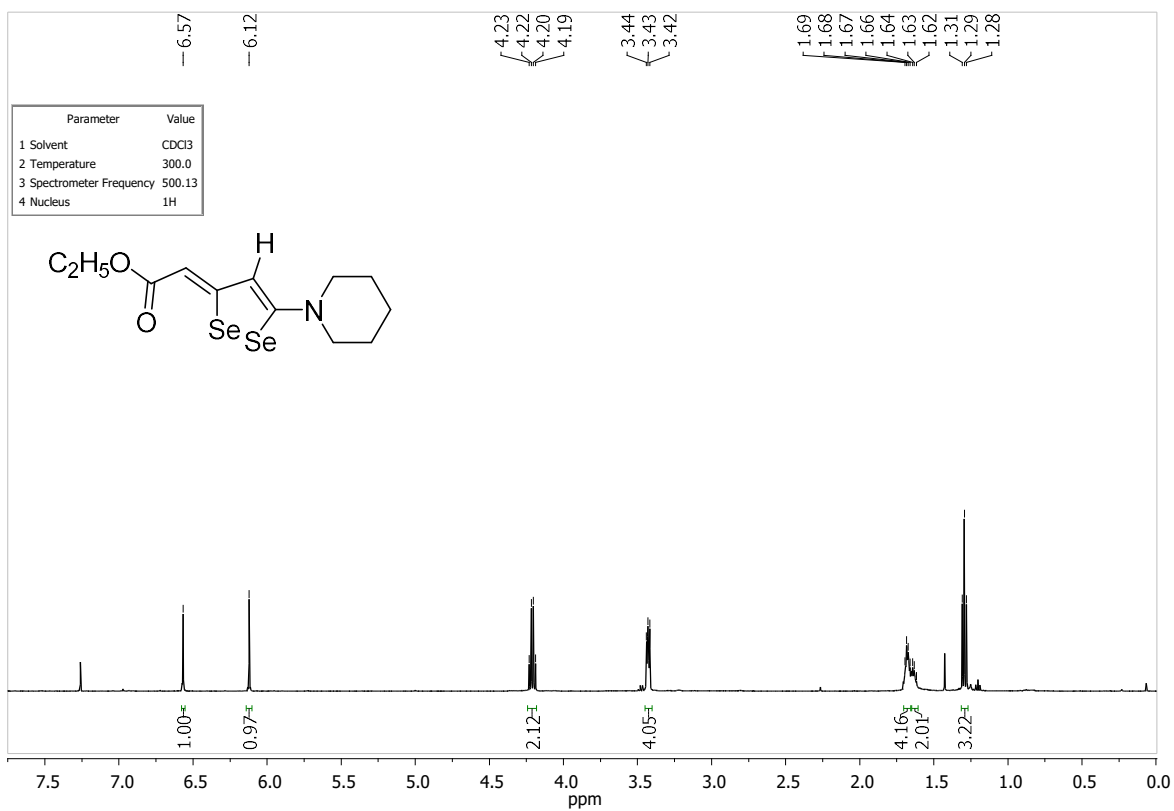



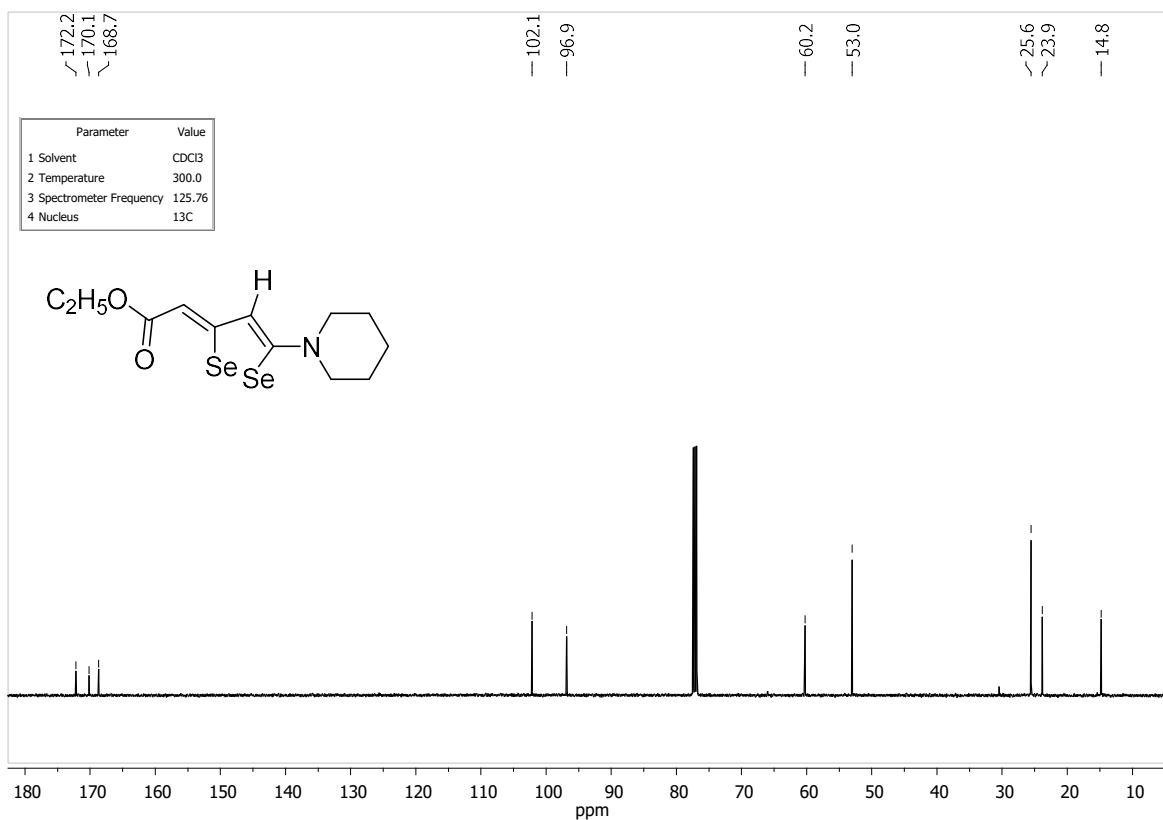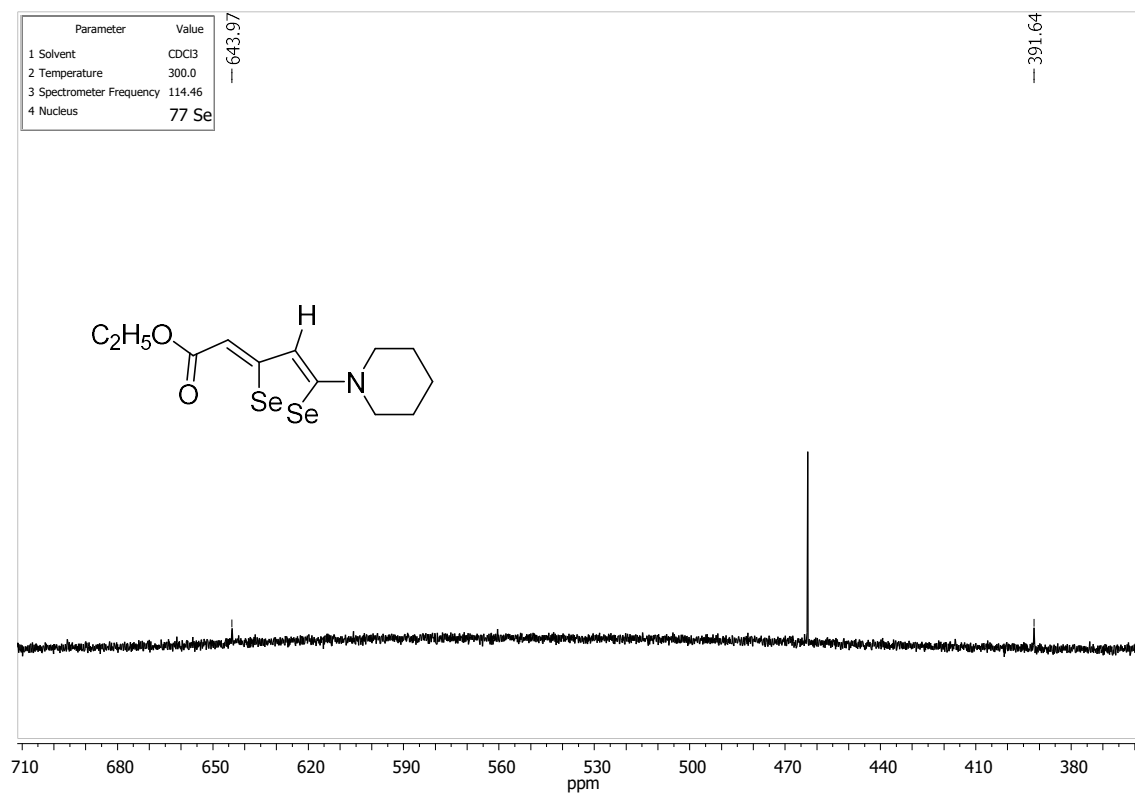

**(4cc) Ethyl (Z)-2-(5-(((1,3-dioxolan-2-yl)methyl)(methyl)amino)-3H-1,2-diselenol-3-ylidene)acetate**

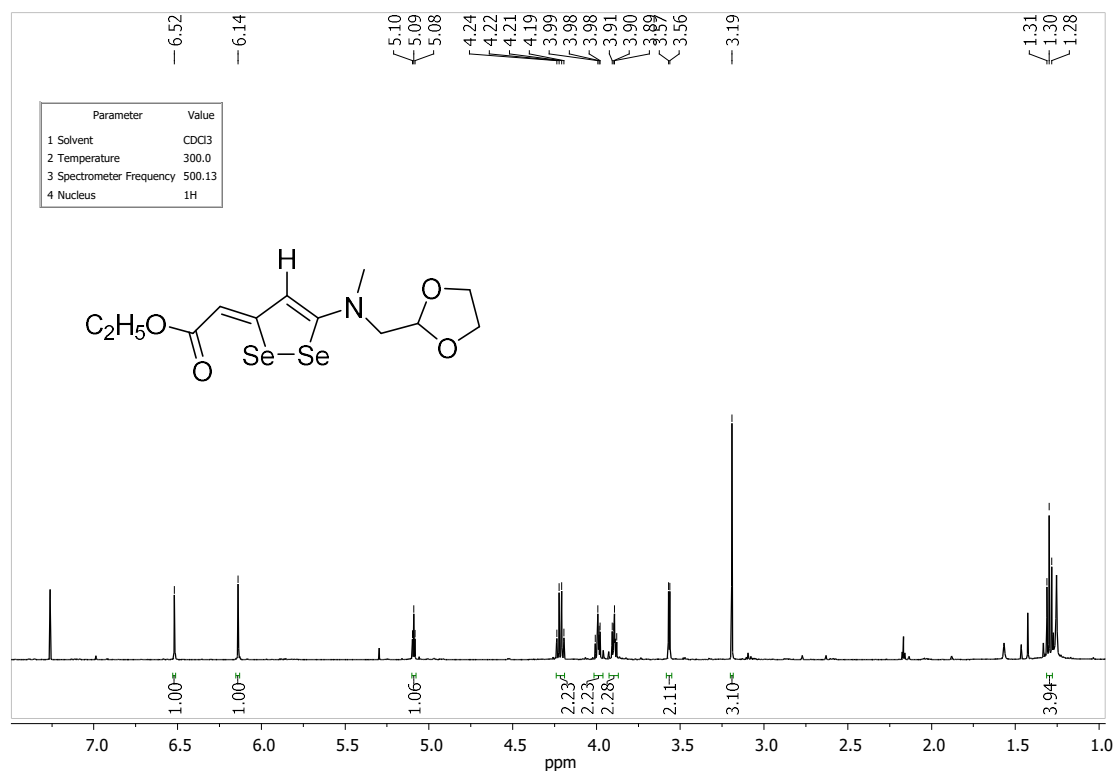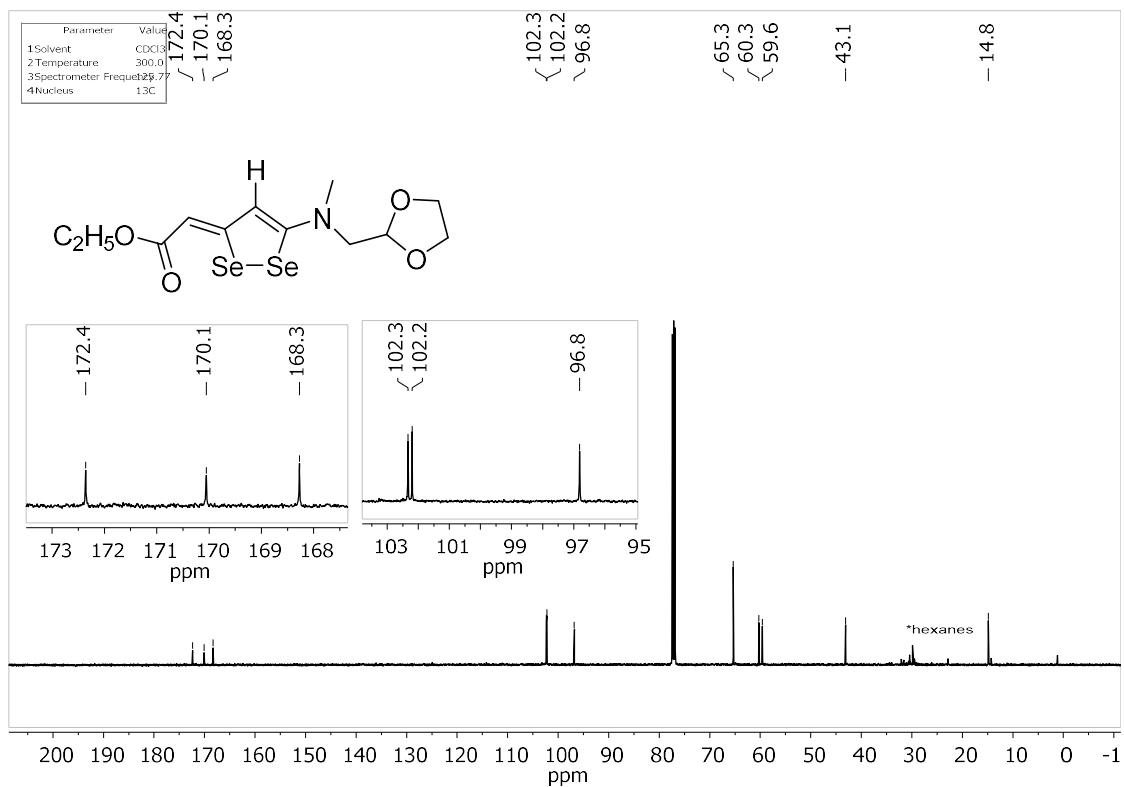

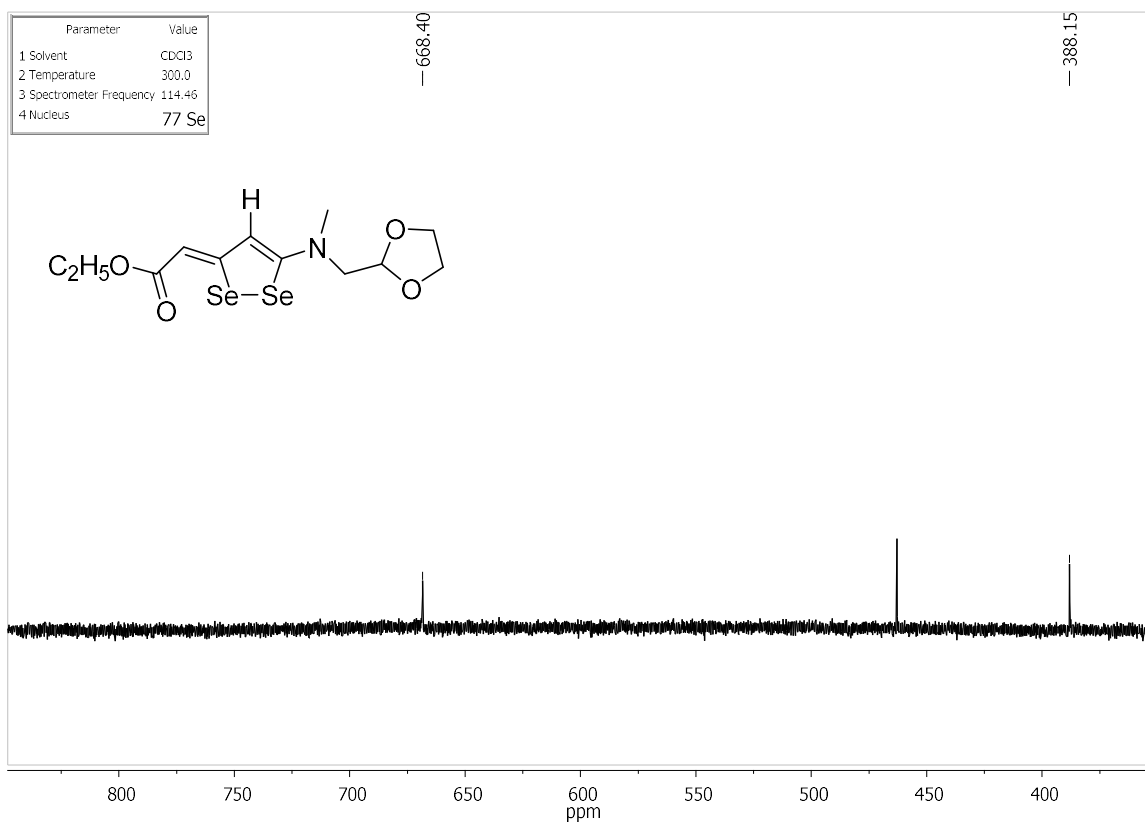

**(5ab) 4-(5-(Piperidin-1-yl)tellurophen-2-yl)benzonitrile**

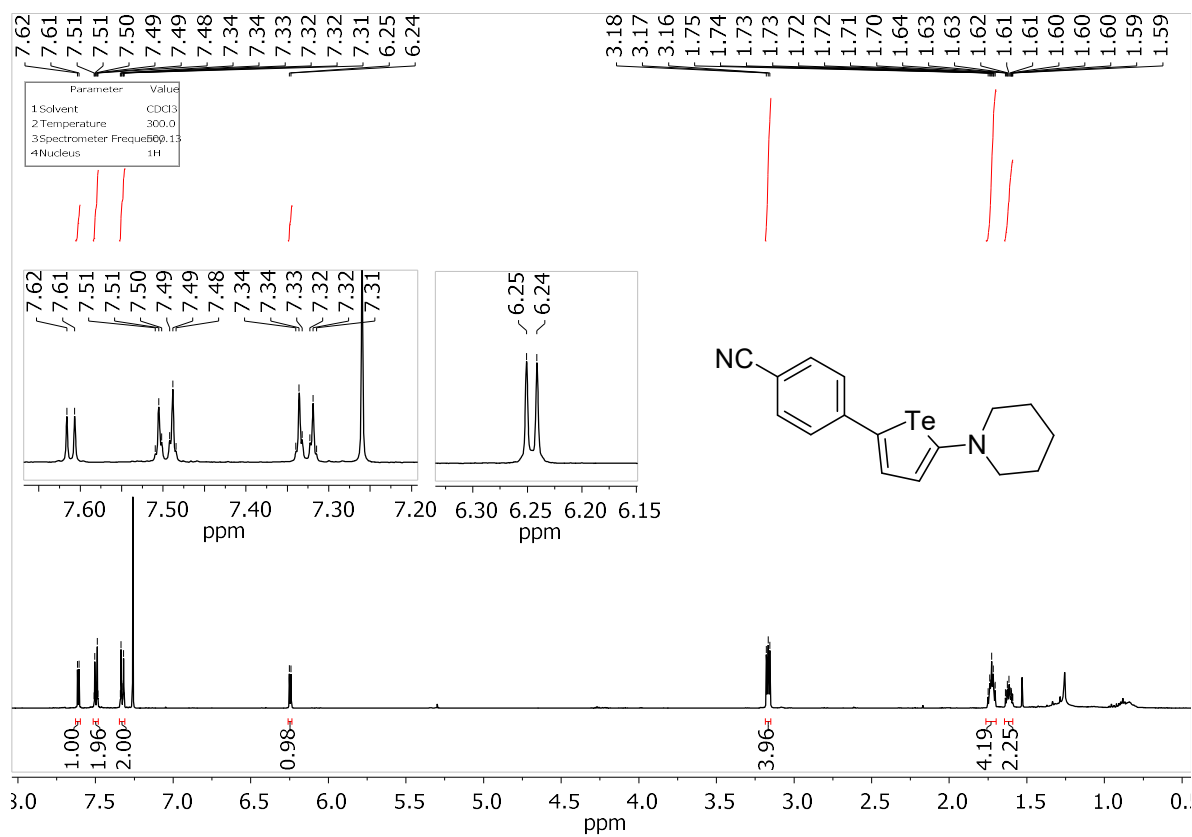

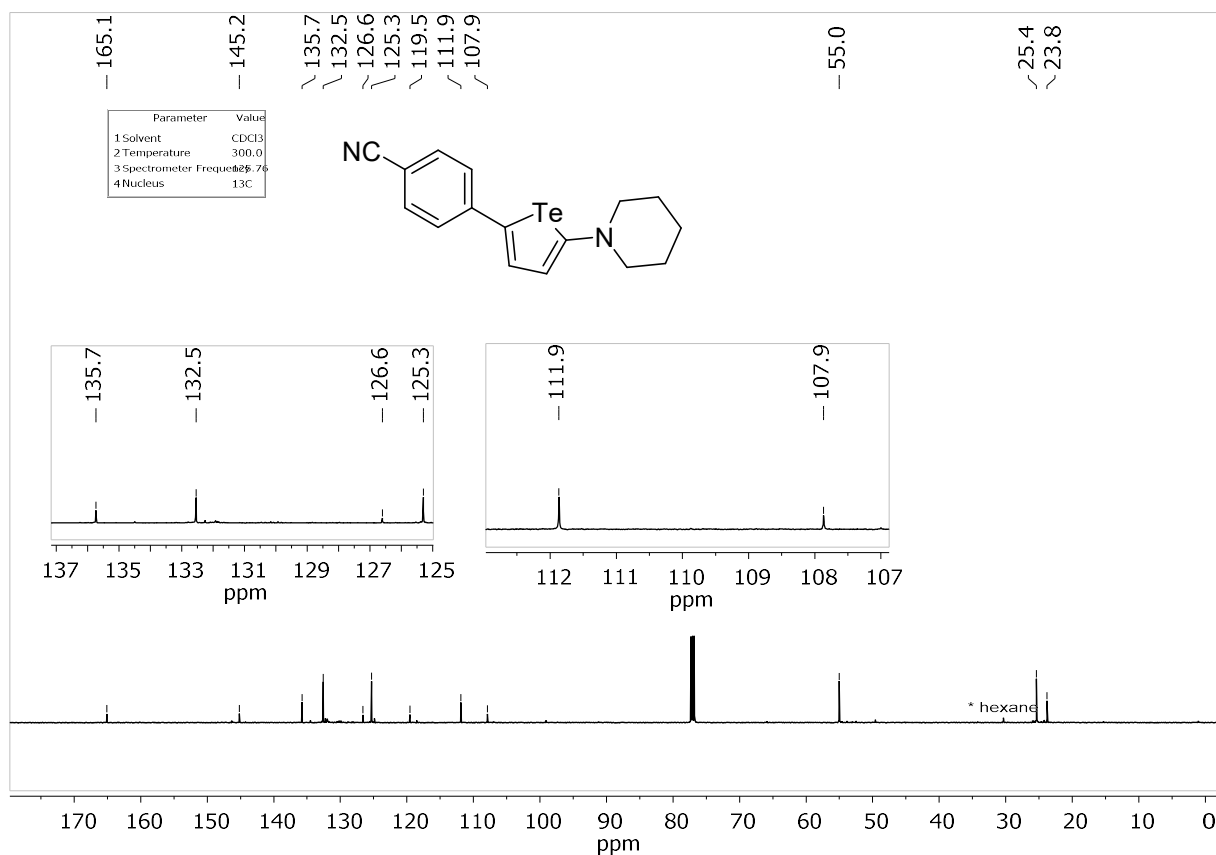

**(5ac) 4-(5-(((1,3-Dioxolan-2-yl)methyl)(methyl)amino)tellurophen-2-yl)benzonitrile**

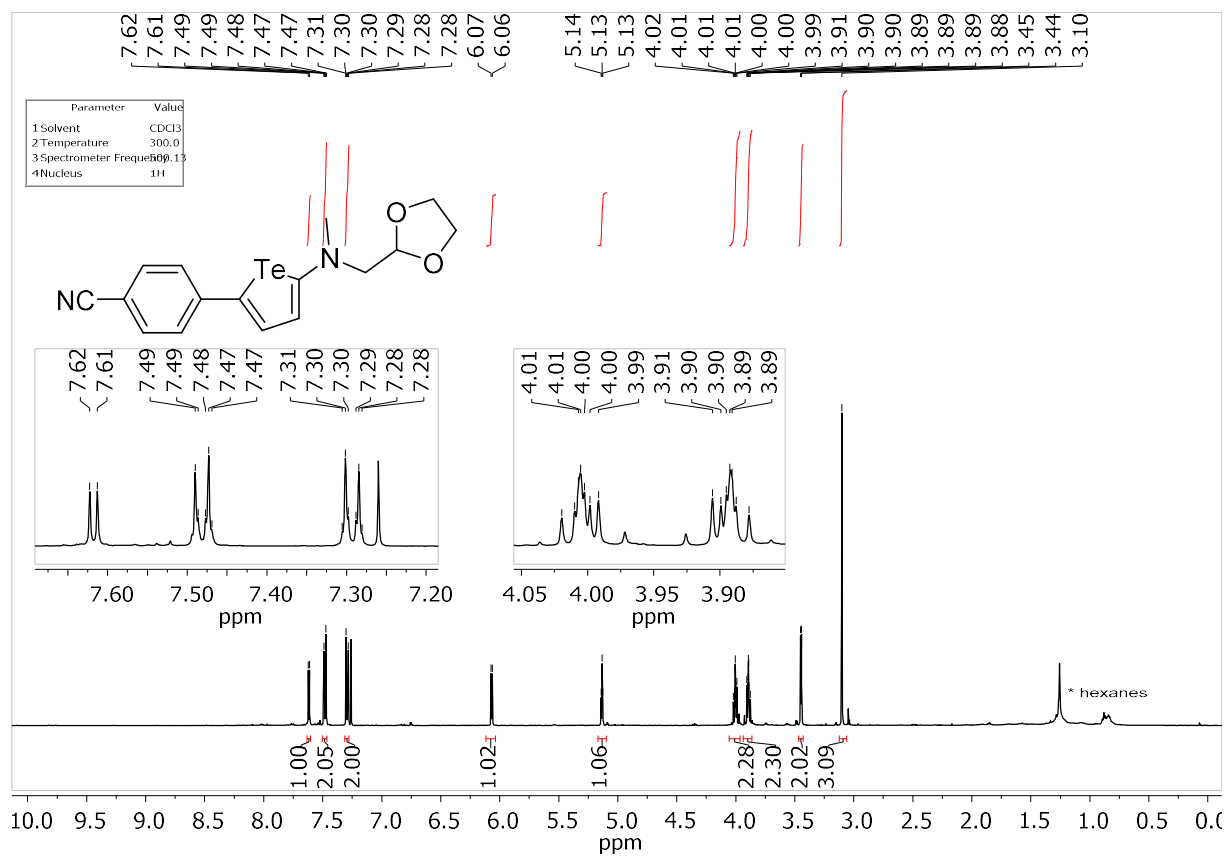

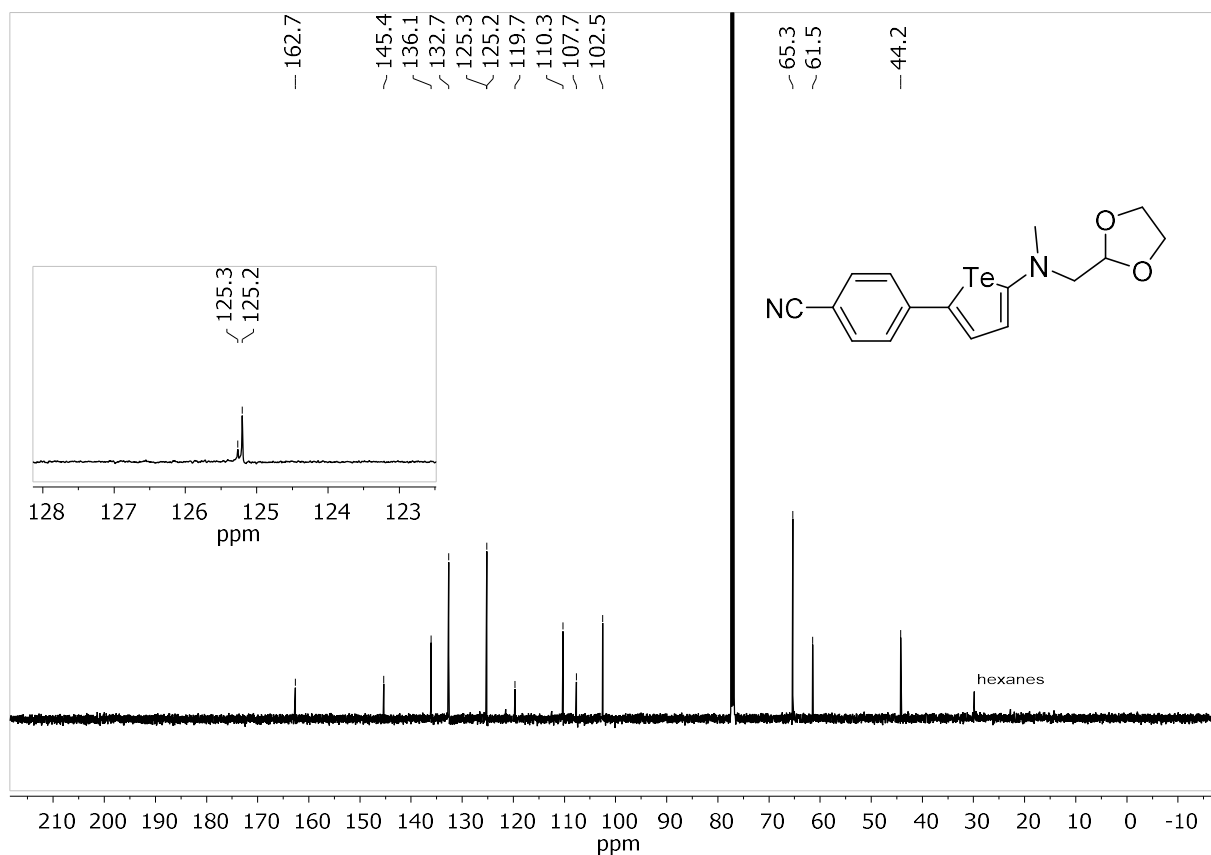

**(5ad) 4-(5-(Benzyl(methyl)amino)tellurophen-2-yl)benzonitrile**

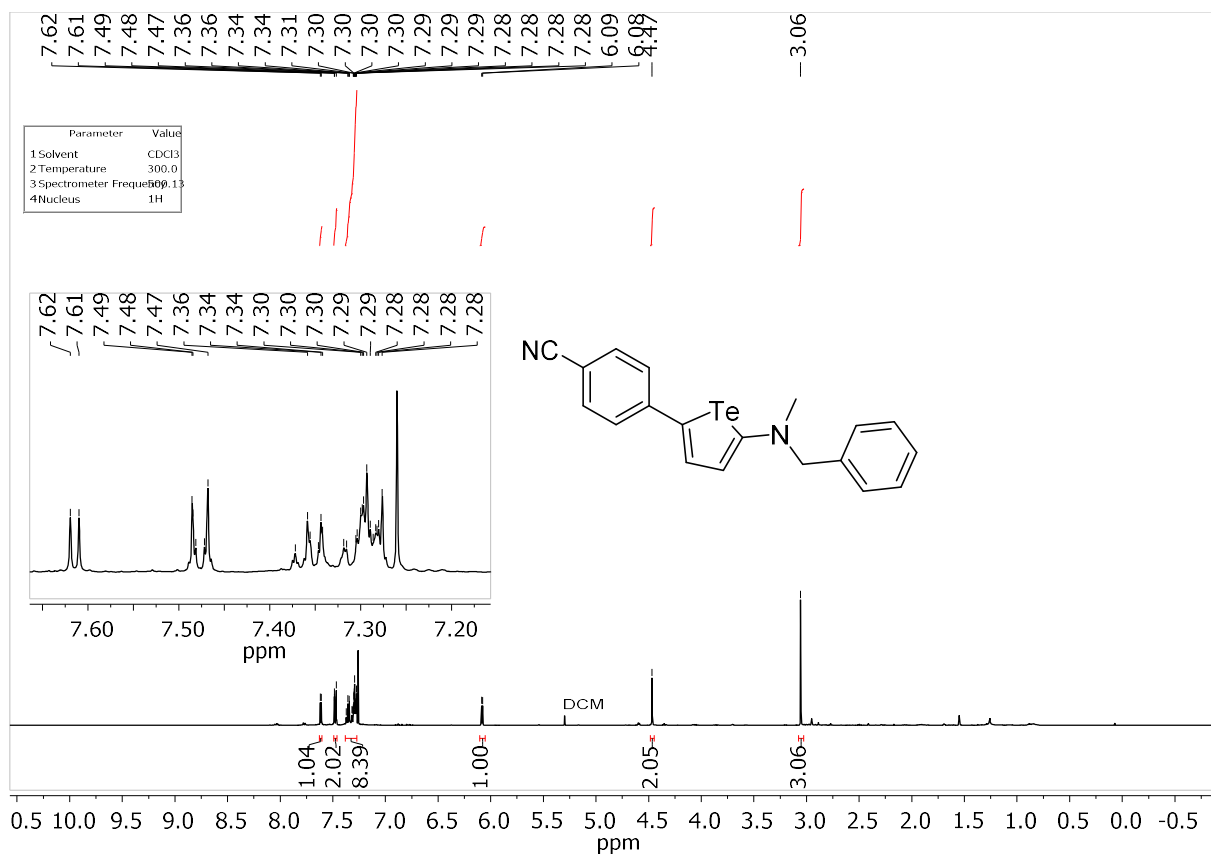

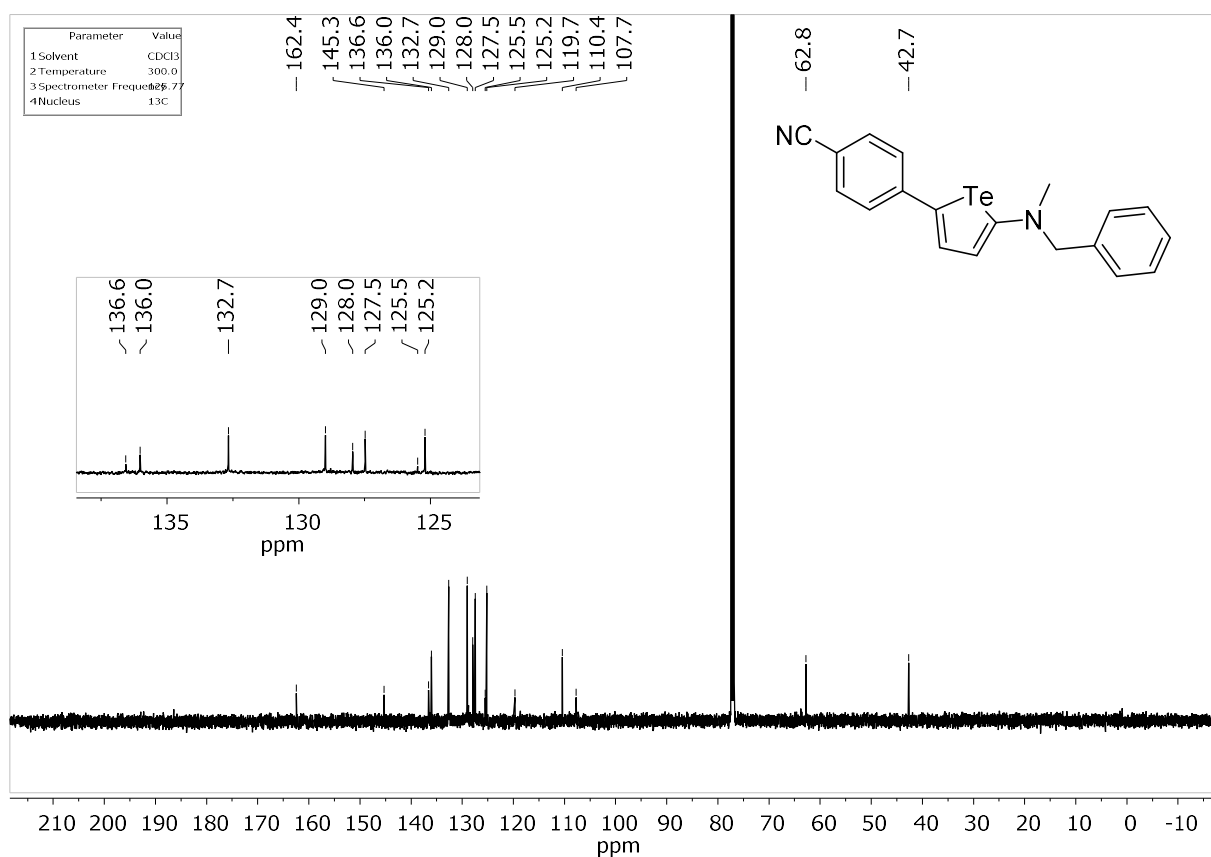

**(5ae) 4-(5-Morpholinotellurophen-2-yl)benzonitrile**

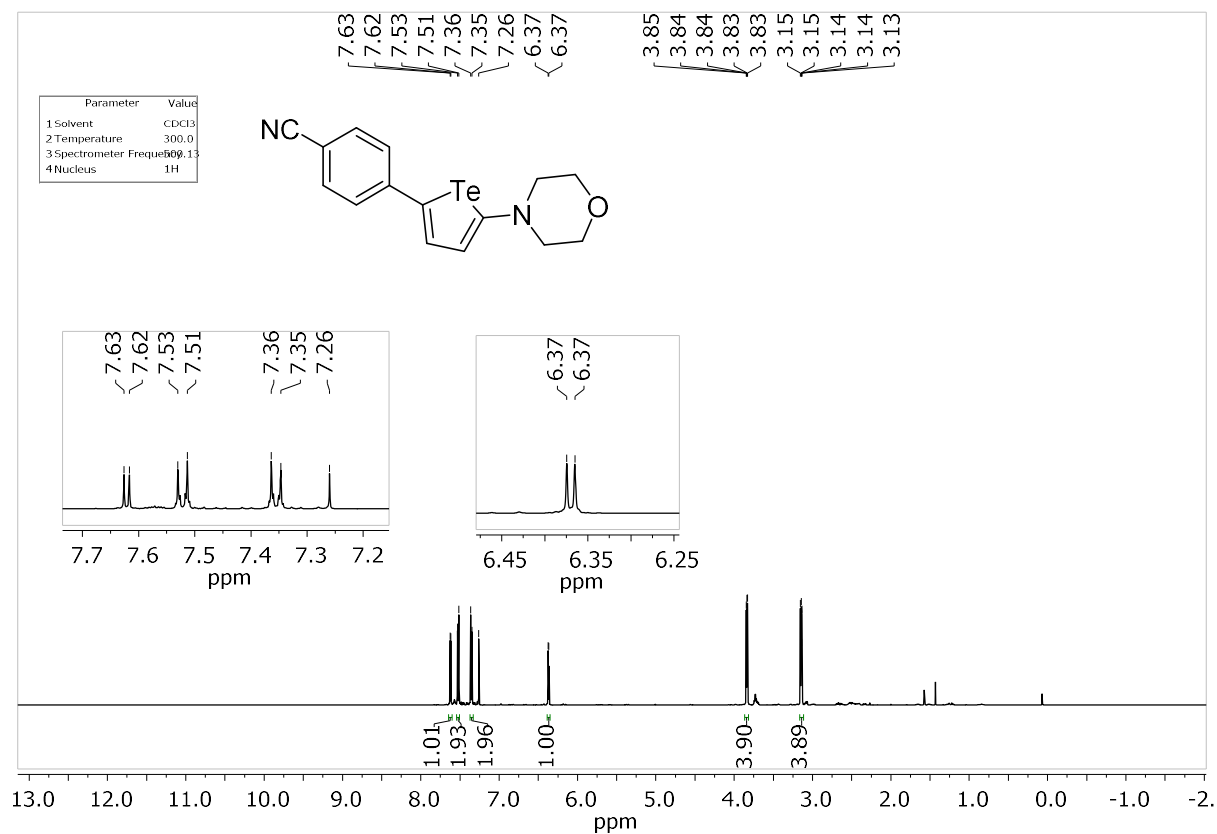

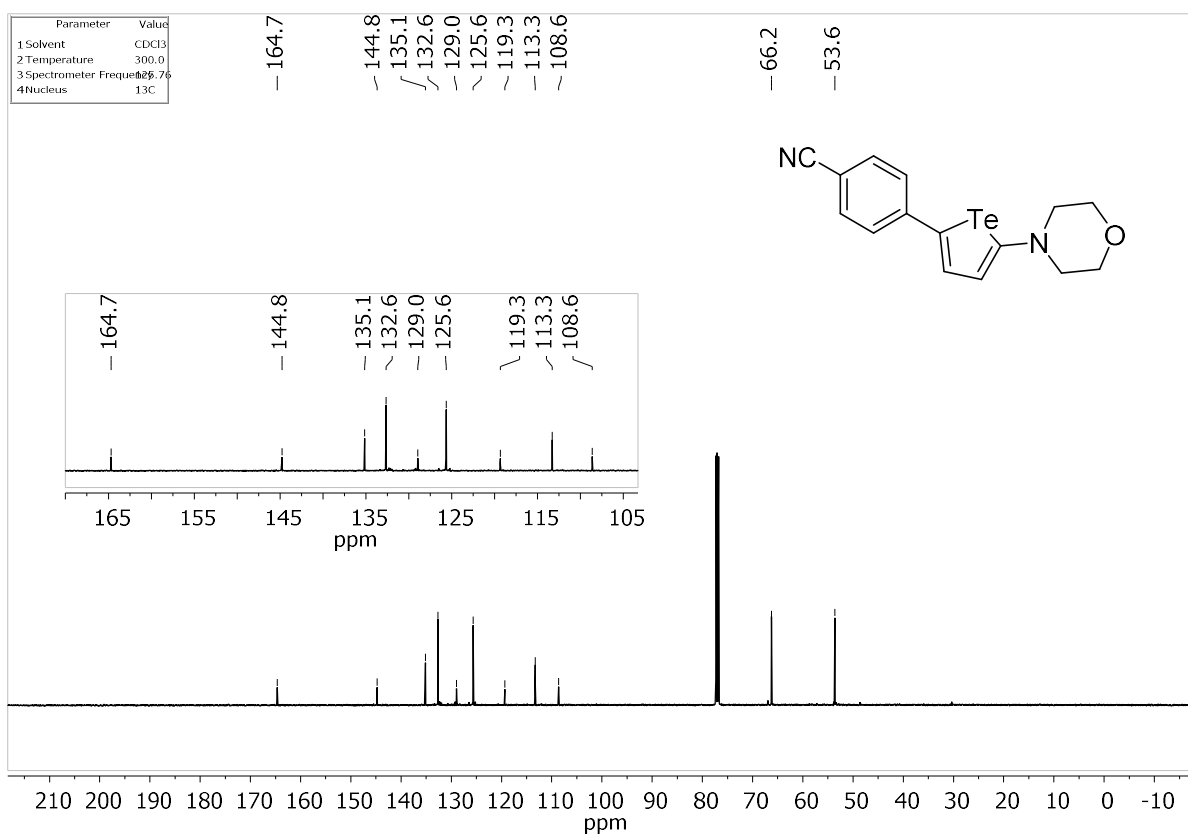

## 5. References

1. (a) Gulia, N. P., B.; Szafert, S., Palladium End-Capped Polyynes via Oxidative Addition of 1-Haloalkynes to Pd(PPh<sub>3</sub>)<sub>4</sub>. *Organometallics* **2015**, *34*, 673-682; (b) Pigulski, B. G., N.; Szafert, S., Synthesis of Long, Palladium End-Capped Polyynes through the Use of Asymmetric 1-Iodopolyynes. *Chem. Eur. J.* **2015**, *21*, 17769-17778; (c) Pigulski, B.; Męcik, P.; Cichos, J.; Szafert, S., Use of Stable Amine-Capped Polyynes in the Regioselective Synthesis of Push–Pull Thiophenes. *J. Org. Chem.* **2017**, *82*, 1487-1498; (d) Shi, W.; Guan, Z.; Cai, P.; Chen, H., Highly efficient and recyclable catalyst for the direct chlorination, bromination and iodination of terminal alkynes. *J. Catal.* **2017**, *353*, 199-204.
2. A. Sørensen, B. R., M. Pittelkow, <sup>77</sup>Se NMR Spectroscopy As a Sensitive Probe for Hammett  $\sigma$  Constants. *J. Org. Chem.* **2015**, *80*, 3852-3857.
3. Loos, M.; Gerber, C.; Corona, F.; Hollender, J.; Singer, H., Accelerated Isotope Fine Structure Calculation Using Pruned Transition Trees. *Anal. Chem.* **2015**, *87* (11), 5738-5744.
4. Sheldrick, G., Crystal structure refinement with SHELXL. *Acta Crystallogr. C* **2015**, *71* (1), 3-8.
